# Supplementary material for: Integrating the perspectives of individuals with spinal cord injuries, their family caregivers and healthcare professionals from the time of rehabilitation admission to community reintegration: protocol for a scoping study on SCI needs
Source: PubMed Central journal article supplement — BMJ Open. 2017 Aug 4;7(8):e014331. doi: 10.1136/bmjopen-2016-014331 (PMC5724190; doi:10.1136/bmjopen-2016-014331), 2017-08-04
Supplement: bmjopen-2016-014331.draft_revisions.pdf [file bmjopen-2016-014331.draft_revisions.pdf]

# BMJ Open

## Integrating the perspectives of individuals with spinal cord injuries, their family caregivers, and healthcare professionals across the continuum of care: protocol for a scoping study on SCI needs

|                                 |                                                                                                                                                                                                                                                                                                                                                                                                                  |
|---------------------------------|------------------------------------------------------------------------------------------------------------------------------------------------------------------------------------------------------------------------------------------------------------------------------------------------------------------------------------------------------------------------------------------------------------------|
| Journal:                        | <i>BMJ Open</i>                                                                                                                                                                                                                                                                                                                                                                                                  |
| Manuscript ID                   | bmjopen-2016-014331                                                                                                                                                                                                                                                                                                                                                                                              |
| Article Type:                   | Protocol                                                                                                                                                                                                                                                                                                                                                                                                         |
| Date Submitted by the Author:   | 20-Sep-2016                                                                                                                                                                                                                                                                                                                                                                                                      |
| Complete List of Authors:       | Moreno, Jhon; McGill University, School of Physical and Occupational Therapy<br>Zidarov, Diana; McGill University, School of Physical and Occupational Therapy<br>Raju, Chandhana; McGill University, School of Physical and Occupational Therapy<br>Boruff, Jill; McGill University, Schulich Library of Science and Engineering<br>Ahmed, Sara; McGill University, School of Physical and Occupational Therapy |
| <b>Primary Subject Heading</b>: | Neurology                                                                                                                                                                                                                                                                                                                                                                                                        |
| Secondary Subject Heading:      | Neurology                                                                                                                                                                                                                                                                                                                                                                                                        |
| Keywords:                       | Spinal cord injury, Needs, Caregiver, Healthcare, Scoping study                                                                                                                                                                                                                                                                                                                                                  |
|                                 |                                                                                                                                                                                                                                                                                                                                                                                                                  |

SCHOLARONE™  
Manuscripts

only

1  
2  
3  
4  
5  
6  
7  
8  
9  
10  
11  
12  
13  
14  
15  
16  
17  
18  
19  
20  
21  
22  
23  
24  
25  
26  
27  
28  
29  
30  
31  
32  
33  
34  
35  
36  
37  
38  
39  
40  
41  
42  
43  
44  
45  
46  
47  
48  
49  
50  
51  
52  
53  
54  
55  
56  
57  
58  
59  
60

# **Integrating the perspectives of individuals with spinal cord injuries, their family caregivers, and healthcare professionals across the continuum of care: protocol for a scoping study on SCI needs**

Alexander Moreno<sup>1,2</sup>, Diana Zidarov<sup>1,2</sup>, Chandhana Raju<sup>1,2</sup>, Jill Boruff<sup>3</sup> & Sara Ahmed<sup>1,2</sup>

<sup>1</sup>Faculty of Medicine, School of Physical and Occupational Therapy, McGill University, CANADA

<sup>2</sup>Center for Interdisciplinary Research in Rehabilitation of Greater Montreal, CANADA

<sup>3</sup>Schulich Library of Science and Engineering, McGill University, CANADA

## **Address for correspondence:**

Alexander Moreno, Ph.D. & Sara Ahmed, Ph.D.

Center for Interdisciplinary Research in Rehabilitation (CRIR) – Constance-Lethbridge Rehabilitation

Centre, CIUSSS Centre-Ouest-de-l'Île-de-Montréal, 7005, Maisonneuve Blvd. West, Room 2-335

Email: [jhon.moreno@mail.mcgill.ca](mailto:jhon.moreno@mail.mcgill.ca) ; [jhon.alexander.moreno@umontreal.ca](mailto:jhon.alexander.moreno@umontreal.ca) ; [sara.ahmed@mcgill.ca](mailto:sara.ahmed@mcgill.ca)

**Institutional addresses and emails:**

Alexander Moreno, Ph.D.: Center for Interdisciplinary Research in Rehabilitation (CRIR) – Constance-Lethbridge Rehabilitation Centre, CIUSSS Centre-Ouest-de-l'Île-de-Montréal, 7005, Maisonneuve Blvd. West, Room 2-335. Email: [jhon.moreno@mail.mcgill.ca](mailto:jhon.moreno@mail.mcgill.ca) ; [jhon.alexander.moreno@umontreal.ca](mailto:jhon.alexander.moreno@umontreal.ca)

Diana Zidarov, pht, Ph.D. Faculty of Medicine, School of Physical and Occupational Therapy, McGill University, 3654 Prom. Sir William Osler, Montreal, Quebec, Canada; Center for Interdisciplinary Research in Rehabilitation (CRIR) – Constance-Lethbridge Rehabilitation Centre, CIUSSS Centre-Ouest-de-l'Île-de-Montréal, 7005, Maisonneuve blvd West, Room 2-335 Email: [diana.zidarov@mail.mcgill.ca](mailto:diana.zidarov@mail.mcgill.ca)

Chandhana Raju, B.S.: Constance-Lethbridge Rehabilitation Centre, CIUSSS Centre-Ouest-de-l'Île-de-Montréal, 7005, Maisonneuve Blvd. West, Room 2-335. Email: [chandhana.raju@mail.mcgill.ca](mailto:chandhana.raju@mail.mcgill.ca)

Jill Boruff, M.L.I.S.: Schulich Library of Science and Engineering, Macdonald-Stewart Library Building 809 Sherbrooke Street West, Montreal, Quebec H3A 0C1. Email: [jill.boruff@mcgill.ca](mailto:jill.boruff@mcgill.ca)

Sara Ahmed, Ph.D.: Center for Interdisciplinary Research in Rehabilitation (CRIR) – Constance-Lethbridge Rehabilitation Centre, CIUSSS Centre-Ouest-de-l'Île-de-Montréal, 7005, Maisonneuve blvd West, Room 2-335. Email: [sara.ahmed@mcgill.ca](mailto:sara.ahmed@mcgill.ca)

Acknowledgements: This work was supported by the Lindsay foundation (INSPIRE). Sara Ahmed is supported by a senior research scientist career award from the *Fonds de la recherche du Québec-Santé*

1  
2  
3  
4  
5  
6  
7  
8  
9  
10  
11  
12  
13  
14  
15  
16  
17  
18  
19  
20  
21  
22  
23  
24  
25  
26  
27  
28  
29  
30  
31  
32  
33  
34  
35  
36  
37  
38  
39  
40  
41  
42  
43  
44  
45  
46  
47  
48  
49  
50  
51  
52  
53  
54  
55  
56  
57  
58  
59  
60

(FRQS). Alexander Moreno is supported by a scholarship of the Networks of Centres of Excellence of Canada (AGE-WELL NCE).

**Word count: 3536**

For peer review only

## Abstract

**Introduction:** There is fragmented information about the different needs following a spinal cord injury (SCI). The information available comes from different stakeholders, such as individuals with SCI, healthcare professionals, and family caregivers. Expressed SCI needs can be met or unmet, they change along the rehabilitation continuum, and can be different for traumatic and non traumatic SCI. The objective of this scoping study is to evaluate and integrate the needs of individuals with SCI, their family caregivers, and those reported by rehabilitation professionals.

**Methods and analysis:** The scoping study involves four steps: a) identifying the research question guiding the scoping study, mainly, the most frequent met and unmet needs reported by adults with traumatic and non traumatic SCI, their family caregivers, and their rehabilitation professionals across the continuum of care; b) identifying relevant studies with a search in electronic databases (Ovid Medline, CINAHL, EMBASE, PsycINFO, Cochrane Library, Web of Science, ProQuest Dissertations and Theses); c) charting the data based on categories refined and adjusted with a stakeholder group to make sure that the relevant information will be extracted; d) collating, summarizing, and reporting the results using as analytical frameworks the Maslow's hierarchical model of human needs and the Ferrans et al.'s model of Health-Related Quality of Life (HRQoL), and e) a stakeholder consultation phase to translate findings among potential knowledge users.

**Ethics and dissemination:** The main concerns related to a SCI needs scoping study are discussed, such as methodological limitations about the type of conclusions that can be drawn and the analytical frameworks for the interpretation of findings. The results of this scoping study will inform best practices for the translation of evidence-based care into clinical practice and the development of new technologies in rehabilitation.

1  
2  
3  
4  
5  
6  
7  
8  
9  
10  
11  
12  
13  
14  
15  
16  
17  
18  
19  
20  
21  
22  
23  
24  
25  
26  
27  
28  
29  
30  
31  
32  
33  
34  
35  
36  
37  
38  
39  
40  
41  
42  
43  
44  
45  
46  
47  
48  
49  
50  
51  
52  
53  
54  
55  
56  
57  
58  
59  
60

**Keywords:** Spinal Cord Injury, needs, caregiver, healthcare, scoping study.

For peer review only

## Introduction

Spinal Cord Injury (SCI) corresponds to a neurological condition affecting 330 to 400 per 100,000 Canadians living in the community [1]. SCI affects mainly young and middle-aged adults, with men showing the highest prevalence regardless of age group (men-to-women ratio of 4.4:1) [2]. Furthermore, SCI is a high-cost chronic disability [3] involving changes in roles, self-image, body function, social interactions, and family relationships [4].

For individuals with SCI, the injury permanently transforms their lives. Indeed, SCI can result in diverse motor, sensory, and autonomic problems [5]. Mobility impairment (e.g., paraplegia, tetraplegia), bowel and bladder incontinence, loss of sensation, and sexual dysfunction are common following SCI [6]. As a result, individuals with SCI have complex health needs as their condition includes chronic multimorbidity, mainly associated with the development of several secondary health conditions (e.g., pain and pressure ulcers) [6]. In addition, compared to community estimates, higher rates of psychological disorders can be present in 17 to 25% of individuals with SCI [7]. Particularly, between 18-37% of individuals with SCI experience depression [8, 9]. Also, studies regarding long-term outcomes indicate that individuals with SCI have low employment rates 20 years post-injury [10]. A review shows that employment rates following SCI range from 11 to 69% depending on the definition of employment and differences in the study methodology [11]. Thus, SCI has an important functional, psychological, and social impact on individuals that requires an integrated care approach across the continuum from acute care to community living. For instance, a Canadian report by the Rick Hansen Institute stressed the need for lifetime access to rehabilitation healthcare for individuals with SCI [12]. Individuals with SCI require follow-up to address their evolving health needs, including the challenges that represent aging with a disability and the development of SCI-related secondary health conditions.

1  
2 For families, the unforeseen nature of the injury leads some of the members into an “unexpected career”  
3  
4 as family caregivers [13]. As family caregivers normally do not have training for the caregiving tasks  
5  
6 (e.g., bathing, dressing, feeding), they can experience role transitions [14], strain [15], isolation [6],  
7  
8 burden [16], poor leisure satisfaction [17], reduced ability to become and remain employed [18], and  
9  
10 marital disruption [19]. Compared to family caregivers of different neurological conditions, family  
11  
12 caregivers of individuals with SCI have experienced more frequent physical distress and present  
13  
14 increased odds of coronary heart disease and obesity [20]. Thus, their experience as family caregivers is  
15  
16 crucial to understand the needs of individuals with SCI, as they progressively become experts by  
17  
18 experience while providing care, supporting and addressing the needs of the care recipient with SCI.  
19  
20  
21  
22  
23  
24

25  
26 For rehabilitation professionals, understanding the interplay of different factors influencing support  
27  
28 mechanisms to assist the transition to home and community after discharge can facilitate social  
29  
30 reintegration of the individual with SCI [21]. In fact, rehabilitation professionals have an understanding  
31  
32 of the needs and barriers that individuals with SCI can encounter. Their observations are valuable as  
33  
34 experts due to their professional roles with good knowledge about the problems that individuals with  
35  
36 SCI face [22]. Also, they can directly contribute to the understanding of the rehabilitation process and  
37  
38 the pre- and post-discharge challenges during service delivery. For instance, shorter lengths of stay  
39  
40 during inpatient rehabilitation can diminish the opportunities to provide information and efficiently  
41  
42 train dyads of individuals with SCI and their family caregivers when they return to the community [21].  
43  
44 Thus, the healthcare professional’s perspective is necessary when depicting a thorough picture of the  
45  
46 barriers to meet the needs of individuals with SCI.  
47  
48  
49  
50  
51  
52  
53

54 Individuals with SCI and their families, as well as healthcare professionals must work together to  
55  
56 effectively meet the diverse post-SCI needs. Their perceptions do not always coincide and therefore all  
57  
58 perspectives need to be taken into account. Indeed, there are differences between the views coming  
59  
60



1  
2 from the clinicians and those of individuals with SCI regarding their treatment [23]. For instance, a  
3  
4 study showed that compared to physiotherapists, some individuals with SCI have unrealistically high  
5  
6 expectations about walking one year post-injury [24]. Another study showed that when the perspectives  
7  
8 of individuals with SCI are acknowledged during rehabilitation, they become more committed to  
9  
10 therapy, they express more confidence in their treating clinicians, and have better satisfaction and  
11  
12 outcomes [25]. The challenge is in understanding the evolution of these needs as they change over  
13  
14 time. The literature on SCI needs indicates that in the first year post-discharge, the fulfillment of  
15  
16 critical needs (e.g., housing, transportation) is below 60% [26], while the long-term care needed is  
17  
18 higher than the care received for information and psychosocial care needs [27]. Further, there are  
19  
20 differences in needs between individuals with traumatic and non-traumatic SCI. Compared to  
21  
22 individuals with non traumatic SCI (>70%), individuals with traumatic SCI (>85%) report more  
23  
24 expressed needs on equipment and technical aids, short-distance transportation, accessible housing,  
25  
26 general healthcare, and SCI-specialized healthcare [28]. In addition, individuals with non traumatic SCI  
27  
28 report more unmet needs in accessible housing, job training, and peer support [29]. Finally, fully  
29  
30 addressing the needs of individuals' with SCI must include evaluating and targeting the needs of family  
31  
32 caregivers. Family caregivers of individuals with SCI report health information needs as the most  
33  
34 important and emotional support needs as those most often unmet [30]. Family caregivers are an  
35  
36 important resource in the treatment of individuals with SCI considering that the quality of the care they  
37  
38 provide matches or exceeds the quality of professional care [31]. But unmet caregiver needs may  
39  
40 prevent optimal care and negatively affect the health of both the care recipients and their own. From a  
41  
42 clinical perspective, understanding the needs of individuals with SCI, knowing the person, and working  
43  
44 with the family can be beneficial to guide their healthcare and improve outcomes [32]. As unmet needs  
45  
46 have a direct relationship with diminished quality of life [28], it is mandatory to understand them and to  
47  
48 find ways to meet them. In consequence, obtaining a comprehensive picture of needs by integrating the  
49  
50 different perspectives of professionals, family caregivers, and individuals with SCI is paramount.  
51  
52  
53  
54  
55  
56  
57  
58  
59  
60

1  
2  
3  
4 Therefore, previous studies have evaluated SCI needs independently considering factors including  
5 needs at different points of the rehabilitation continuum (e.g., inpatient, outpatient, and community)  
6 and with different types of SCI (e.g., traumatic versus non traumatic SCI, complete versus incomplete),  
7 from the perspective of individuals with SCI, family caregivers, and healthcare professionals. Further,  
8 studies have mainly considered SCI needs from a health services perspective rather than from a patient-  
9 centered perspective that accounts for areas that influence needs outside of the health system. To our  
10 knowledge there are no previous studies that have evaluated the variations in factors and synthesising  
11 these needs together from a patient-centered perspective. With fragmented information, it remains  
12 difficult for patients, family caregivers, health professionals, and researchers to understand the current  
13 gaps in SCI care and the most efficient ways to deliver care that are most likely to address unmet needs.  
14  
15  
16  
17  
18  
19  
20  
21  
22  
23  
24  
25  
26  
27  
28  
29

30 The objective of this study is to review the literature on SCI needs using a scoping study approach  
31 given the diffuse literature on SCI needs. Scoping studies allow for an appraisal of the literature and  
32 have four objectives [33]: a) to examine the extent, range, and nature of the research activity, b) to  
33 determine the value of conducting a systematic review, c) to summarize and disseminate research  
34 findings, and d) to identify gaps in the literature. This methodological strategy was chosen because  
35 compared to systematic reviews, scoping studies address broader topics and questions where different  
36 study designs are used, they intend to rapidly map the key concepts of a research area, and they  
37 encompass a comprehensive coverage of the literature (breadth more than in-depth). This scoping study  
38 will provide broad understanding and synthesis of SCI needs as reported by different stakeholders, for  
39 traumatic and non-traumatic SCI, across the care continuum. This scoping study will help us to identify  
40 unexplored areas of SCI needs and to provide recommendations to improve the quality of health  
41 services, to inform the development of new interventions to address unmet needs.  
42  
43  
44  
45  
46  
47  
48  
49  
50  
51  
52  
53  
54  
55  
56  
57  
58  
59  
60

## Theoretical frameworks

SCI needs will be synthesised based on two guiding theoretical frameworks: a) the conceptual framework of Maslow's *hierarchy model of needs* coming from humanistic psychology [34] and the Ferrans and colleagues' model of Health-Related Quality of Life (HRQoL), which is a modified version of the Wilson and Cleary model of HRQoL [35]. Both the Maslow's model and the Ferrans et al.'s model are informative and appropriate to frame SCI needs taking into account the perspectives of different stakeholders.

The definition of needs has been variable across published studies. Some of them define needs as the discrepancies between what is desired or optimal based on a guideline, and what is actually occurring [36], a circumstance requiring a course of action [37], or services that are necessary to support individual's community living [28]. For the current scoping study, a broader definition of needs corresponds to a lack of something that is essential to a person's existence or well-being, according to Maslow's hierarchical model [38]. In his groundbreaking theory of motivation, Maslow describes human needs as being hierarchical. Figure 1 depicts the pyramidal representation of human needs. As described in his theory, human needs can be classified in five levels: a) physiological needs, b) safety and security needs, c) belonging and love needs, d) esteem needs, and e) self-actualization needs. In healthcare, the hierarchical model of needs has been applied to nursing [39], geriatric care [40], intensive care [41], palliative care [42], disability and rehabilitation [43], as well as to specific conditions such as dementia [44], type 1 diabetes [45], addiction [46], homeless adults with serious mental illness [47], and dissociative and conversion disorders [48]. Although some of these needs cannot be provided by the health system, the use of this framework has been useful to prioritize, conceptualize and understand needs, to develop a more humanistic approach to successful healthcare, to support person-centered care planning, and to redefine, change and improve the culture of care.

1  
2 Given that a SCI impacts all domains of the person's life (physical, social, psychological) needs are not  
3 only related to the characteristics of the individual but also the environment the person lives in.  
4  
5 Therefore the Ferrans et al's model of HRQoL complements Maslow's model as it provides a guide for  
6  
7 understanding characteristics of the individual (that are mainly encompassed in the hierarchy model of  
8  
9 needs), but also the environmental component (e.g., physical and social environment), as well as  
10  
11 health-related domains that influence general health perceptions and quality of life (e.g., symptoms,  
12  
13 function, and participation) that need to be addressed when making evidence-based recommendations  
14  
15 regarding unmet SCI needs [49]. Thus, both theoretical models will provide an understanding of the  
16  
17 dynamics between the motivational aspects associated with SCI-needs (Maslow) and the environmental  
18  
19 influences on the HRQoL of individuals with SCI (Ferrans et al), given that unmet needs have a direct  
20  
21 relationship with diminished quality of life [28].  
22  
23  
24  
25  
26  
27  
28  
29

30 Figure 1. Maslow's hierarchy model of human needs  
31  
32  
33  
34

---

35  
36  
37 Insert Figure 1 here  
38  
39

---

40  
41  
42 In summary, as studies about SCI needs are conducted in different points of the rehabilitation  
43  
44 continuum (e.g., inpatient, outpatient, and community) and with different types of injuries (e.g.,  
45  
46 traumatic versus non traumatic SCI, complete versus incomplete), a scoping study approach integrating  
47  
48 the different perspectives of healthcare professionals, family caregivers, and individuals with SCI,  
49  
50 guided by the Maslow and the Ferrans et al's models can help to depict a comprehensive picture of  
51  
52 their needs. SCI needs are ongoing and they change in the rehabilitation continuum over the years [50].  
53  
54  
55 In the very stressful period of the acute phase, SCI needs are not the same as the situation is not  
56  
57 immediately assimilated following the injury, whereas outside the rehabilitation center SCI needs  
58  
59  
60

1  
2 change depending on the path that individuals follow [51]. This integrative approach will help to  
3  
4 identify research gaps regarding SCI needs across the continuum of care and to holistically understand  
5  
6 the met and unmet needs to improve healthcare (see figure 2).  
7  
8  
9

10  
11 Figure 2. Integrative approach towards SCI needs  
12

---

13  
14  
15  
16  
17  
18  
19  
20  
21  
22  
23  
24  
25  
26  
27  
28  
29  
30  
31  
32  
33  
34  
35  
36  
37  
38  
39  
40  
41  
42  
43  
44  
45  
46  
47  
48  
49  
50  
51  
52  
53  
54  
55  
56  
57  
58  
59  
60

Insert Figure 2 here

---

## Methods

The current scoping study will use the methodology described by Arksey and O'Malley (2005) [33] .

### *Step 1. Identifying the research question*

The research question guiding the current scoping study is “Which are the most frequent met and unmet needs (e.g., information needs, home support needs, personal care needs, respite needs, psychological support needs, educational needs, employment needs, sexuality needs, technological needs, telerehabilitation needs, spiritual needs, among others) reported by adults with traumatic and non traumatic SCI, their family caregivers, and their rehabilitation professionals across the continuum of care?”

Specifically, the current scoping study has four objectives:

1. To synthesize the needs of individuals with SCI as perceived by themselves, their family caregivers, and their rehabilitation professionals according to the categories of the hierarchy of human needs and the Ferrans et al.'s model of HRQoL.
2. To classify needs as met and unmet.

- 1
  - 2
  - 3
  - 4
  - 5
  - 6
  - 7
  - 8
  - 9
  - 10
  - 11
  - 12
  - 13
  - 14
  - 15
  - 16
  - 17
  - 18
  - 19
  - 20
  - 21
  - 22
  - 23
  - 24
  - 25
  - 26
  - 27
  - 28
  - 29
  - 30
  - 31
  - 32
  - 33
  - 34
  - 35
  - 36
  - 37
  - 38
  - 39
  - 40
  - 41
  - 42
  - 43
  - 44
  - 45
  - 46
  - 47
  - 48
  - 49
  - 50
  - 51
  - 52
  - 53
  - 54
  - 55
  - 56
  - 57
  - 58
  - 59
  - 60
3. To explore the evolution of met/unmet needs across the continuum of care.
  4. To provide recommendations to improve SCI care.

### *Step 2. Identifying eligible studies*

We will search published articles with the following inclusion criteria: a) publications from all health professions, b) describing different needs in both traumatic and non traumatic SCI, c) participants with 18 years of age and older, d) including acute to chronic injuries, e) regardless of year of publication, f) qualitative and quantitative studies, g) available in English language, and f) grey literature. We will exclude: a) conference abstracts, b) articles published in other languages, and c) studies addressing paediatric populations.

### *Search strategy and information sources*

A health science librarian (JB) developed the search strategy for Ovid Medline (Table 1) and had it peer reviewed by another librarian per the PRESS standard [52]. This search strategy will be adapted for subsequent databases. The following databases will be searched with no date or language limits applied: Ovid Medline®, CINAHL, EMBASE, PsycINFO, Cochrane Library, Web of Science, ProQuest Dissertations and Theses.

Grey literature will be searched on SCI websites, scientific and professional associations, and also using search engines on the Internet (e.g., Google and Yahoo). When using search engines, we will retain the first 50 results for the analysis given the amount of information available.

Table 1. Search strategy for Ovid MEDLINE(R) In-Process & Other Non-Indexed Citations, Ovid MEDLINE(R) Daily and Ovid MEDLINE(R) 1946 to present

|    |                                                                                                                                                                                                                                                                                                                                                                                                                                                                                                                                                   |
|----|---------------------------------------------------------------------------------------------------------------------------------------------------------------------------------------------------------------------------------------------------------------------------------------------------------------------------------------------------------------------------------------------------------------------------------------------------------------------------------------------------------------------------------------------------|
| 1  | exp Spinal Cord Injuries/                                                                                                                                                                                                                                                                                                                                                                                                                                                                                                                         |
| 2  | spinal cord injur*.tw,kf.                                                                                                                                                                                                                                                                                                                                                                                                                                                                                                                         |
| 3  | exp Paraplegia/                                                                                                                                                                                                                                                                                                                                                                                                                                                                                                                                   |
| 4  | Quadriplegia/                                                                                                                                                                                                                                                                                                                                                                                                                                                                                                                                     |
| 5  | tetraplegia.tw,kf.                                                                                                                                                                                                                                                                                                                                                                                                                                                                                                                                |
| 6  | paraplegia.tw,kf.                                                                                                                                                                                                                                                                                                                                                                                                                                                                                                                                 |
| 7  | Quadriplegia.tw,kf.                                                                                                                                                                                                                                                                                                                                                                                                                                                                                                                               |
| 8  | spinal column injur*.tw,kf.                                                                                                                                                                                                                                                                                                                                                                                                                                                                                                                       |
| 9  | central cord injur*.tw,kf.                                                                                                                                                                                                                                                                                                                                                                                                                                                                                                                        |
| 10 | 1 or 2 or 3 or 4 or 5 or 6 or 7 or 8 or 9                                                                                                                                                                                                                                                                                                                                                                                                                                                                                                         |
| 11 | ((met or unmet or expressed) adj3 (need or needs)).tw,kf.                                                                                                                                                                                                                                                                                                                                                                                                                                                                                         |
| 12 | Needs Assessment/                                                                                                                                                                                                                                                                                                                                                                                                                                                                                                                                 |
| 13 | "Health Services Needs and Demand"/                                                                                                                                                                                                                                                                                                                                                                                                                                                                                                               |
| 14 | Patient Preference/                                                                                                                                                                                                                                                                                                                                                                                                                                                                                                                               |
| 15 | Patient Satisfaction/                                                                                                                                                                                                                                                                                                                                                                                                                                                                                                                             |
| 16 | (sexual* adj2 (concern* or satisfaction or need or needs)).tw,kf.                                                                                                                                                                                                                                                                                                                                                                                                                                                                                 |
| 17 | ((caregiver* or famil* or spouse* or person* or patient* or client* or individual* or user* or research) adj3 (priorities or expectation* or preference* or perspective*)).tw,kf.                                                                                                                                                                                                                                                                                                                                                                 |
| 18 | ((self-actualization or self-esteem or esteem or spiritual or belonging or love or physiological or security or caregiver* or famil* or spouse* or transportation or support or social or economic or health or life or telerehabilitation or rehabilitation or rehabilitative or information or economic or emotional or community or home or personal care or respite or psychological or instrumental or safety or health care or healthcare or educational or employment or leisure or housing or technological) adj3 (need or needs)).tw,kf. |
| 19 | 11 or 12 or 13 or 14 or 15 or 16 or 17 or 18                                                                                                                                                                                                                                                                                                                                                                                                                                                                                                      |
| 20 | self concept/ or self efficacy/                                                                                                                                                                                                                                                                                                                                                                                                                                                                                                                   |
| 21 | (satisfaction or needs).tw,kf.                                                                                                                                                                                                                                                                                                                                                                                                                                                                                                                    |
| 22 | 20 and 21                                                                                                                                                                                                                                                                                                                                                                                                                                                                                                                                         |
| 23 | 19 or 22                                                                                                                                                                                                                                                                                                                                                                                                                                                                                                                                          |
| 24 | 10 and 23                                                                                                                                                                                                                                                                                                                                                                                                                                                                                                                                         |

### Step 3: Study selection

In the first step, a reference management software (EndNote X7) will be used to merge the results and remove the duplicates before screening the abstracts. Later, a data extraction form will be developed by the research team to screen the abstracts based on the eligibility criteria described in step 2. Two independent reviewers will conduct the selection of abstracts starting with a pilot phase involving the

1  
2 examination of the first 20 titles and abstracts to screen and decide the retention of the abstract based  
3  
4 on the inclusion criteria. The results of the independent ratings will be recorded separately using the  
5  
6 data extraction form. Inter-rater agreement will be assessed using the kappa statistic [53]. Inter-rater  
7  
8 agreement below 75% will lead to a revision and clarification of the eligibility criteria. The process will  
9  
10 be repeated until an agreement of 75% will be reached, which is evidence of excellent agreement. This  
11  
12 is important as it is recommended that discussions are being held regarding the challenges and  
13  
14 uncertainties related to study selection and to refine the search strategy as needed [54]. Finally, all  
15  
16 eligible studies and those classified as unclear (i.e., requiring further information to make a final  
17  
18 decision regarding their retention) will be independently reviewed as full-text articles. Inter-rater  
19  
20 agreement will be re-assessed using the kappa statistic [53] on a random sample of 10 publications.  
21  
22 Disagreements at this stage will be resolved by consensus. In case of persistent disagreement, a third  
23  
24 reviewer will be consulted to determine the final inclusion.  
25  
26  
27  
28  
29  
30  
31  
32

#### 33 *Step 4. Data extraction process*

34  
35 The data extracted in the previous step will include the information corresponding to author(s), year of  
36  
37 publication, country of origin and context (where the study was conducted), status of publication (e.g.,  
38  
39 published or grey literature), journal, aims/purpose, study population (individuals with SCI, family  
40  
41 caregivers, rehabilitation professionals) and sample size (if applicable), SCI type (traumatic and non  
42  
43 traumatic), level(s) of care (acute, primary care, community), time since SCI, methodology/methods  
44  
45 (study design, measures), key findings that relate to the scoping study question/s (in terms of met and  
46  
47 unmet specific categories of needs). At this stage, two independent reviewers will extract the  
48  
49 information based on the first 10 publications. Also, during the charting of the information, the  
50  
51 reviewers will meet following the extraction of the first 10 studies to make sure that the data extraction  
52  
53 follows consistently the purpose of the study. A meeting to evaluate the consistency of the information  
54  
55  
56  
57  
58  
59  
60



1  
2 extracted will allow the reviewers to identify inconsistencies and make decisions regarding the best  
3  
4 way to deal with ambiguity.  
5  
6  
7

8  
9 An iterative process consisting of inter-reviewer discussions held at the beginning, in the middle and at  
10  
11 the end of the extraction will lead to a consensus regarding the best way to extract the data. When  
12  
13 disagreements persist, a third independent reviewer will be consulted.  
14  
15

#### 16 17 18 *Step 5. Data synthesis* 19

20  
21 This phase involves collating, summarizing, and reporting the results. Compared to systematic reviews,  
22  
23 scoping studies present a narrative account of a potentially large body of material [33]. Thus, guided by  
24  
25 the previous theoretical frameworks, we intend to identify a descriptive numerical summary (e.g.,  
26  
27 characteristics of included studies, types of study design, characteristics of the study population,  
28  
29 geographical location) and emerging themes (deductive thematic analysis) [54]. Using as an analytical  
30  
31 framework the Maslow's hierarchical model of human needs, we will extract the main themes  
32  
33 corresponding to the five categories of human needs and classify them as described by professionals,  
34  
35 family caregivers, and individuals with SCI. When available, unmet SCI needs will be classified based  
36  
37 on the Ferrans et al.'s model of HRQoL as characteristics of the individual and characteristics of the  
38  
39 environment, and their relationship with other components (e.g., biological function, symptoms,  
40  
41 functional status, general health perceptions, and overall quality of life). Following the thematic  
42  
43 analysis, special considerations regarding the implications for research, policy and practice will be  
44  
45 presented.  
46  
47  
48  
49  
50

#### 51 52 53 *Step 6: Stakeholder consultation* 54

55  
56 The objective of this stage is to start translating knowledge into practice by disseminating results  
57  
58 among potential knowledge users. This consultation will be done at the beginning of the process  
59  
60

1  
2 (requesting feedback to refine the research question and make sure that the research team is not missing  
3  
4 useful information), during the study (validate the data extraction, decide the best way to align the  
5  
6 information with stakeholders' needs) and when preliminary or final results are available (knowledge  
7  
8 mobilisation). For the current scoping study, relevant stakeholders include support groups of  
9  
10 individuals with SCI and their family caregivers, clinicians, and decision-makers. The meetings will be  
11  
12 organized either in a face-to-face format or using videoconference to allow broader participation,  
13  
14 giving equal representation to the different groups.  
15  
16  
17  
18  
19

## 20 21 **Discussion**

22  
23  
24  
25  
26 The current scoping study will answer the question about the most frequent met and unmet needs  
27  
28 reported by adults with traumatic and non traumatic SCI, their family caregivers, and their  
29  
30 rehabilitation professionals across the continuum of care. The results of the current scoping study could  
31  
32 have implications from different viewpoints: a) rehabilitation can be informed from the synthesis of  
33  
34 SCI needs because clinicians can become more sensitive as they increase awareness about the  
35  
36 complexity of SCI expressed and unmet needs across the continuum of care, b) service provision could  
37  
38 be modified from gaining understanding about the gap between unmet and expressed needs, c) the view  
39  
40 of rehabilitation as a changing process with evolving needs in different phases of care can help  
41  
42 clinicians to understand and modify their practice when considering SCI needs as dynamic in different  
43  
44 stages of care, d) the conception of new studies can be informed based on our comprehensive picture of  
45  
46 SCI needs as it will suggest priorities in the research agenda, e) the development of new interventions  
47  
48 could benefit from our conclusions as they will provide information to help to make informed decisions  
49  
50 to address the most important unmet needs as outcomes, and f) policy makers could benefit from these  
51  
52 results as they will be able to implement modifications to existent programs to adjust to the  
53  
54  
55  
56  
57  
58  
59  
60

1  
2 complexities of the interactions among different stakeholders involved in the provision of services to  
3  
4 increase SCI needs satisfaction.  
5  
6  
7

8  
9 Scoping studies have some methodological limitations that include the fact that the quality of the  
10 evidence is not appraised. Compared to systematic reviews where the quality appraisal and the relative  
11 weight of evidence in favour or against a specific intervention is very important, scoping studies are  
12 descriptive and narrative [33]. However, scoping studies provide valid specific research questions  
13 needing a systematic review through a careful process of scrutinizing evidence coming from different  
14 methodologies and study designs. Also, scoping studies are not a short summary of many articles and,  
15 as such, they use frameworks or themes to articulate their findings [54]. For the current scoping study,  
16 the theoretical frameworks guiding the analysis of the information have been carefully chosen and  
17 weighted against other competing models. However, we are aware that the findings could be  
18 interpreted using alternative analytical frameworks.  
19  
20  
21  
22  
23  
24  
25  
26  
27  
28  
29  
30  
31  
32  
33  
34

35 In conclusion, this study protocol presents the rationale and methodology for a scoping study on SCI  
36 needs. Through a rigorous and transparent method, engaging individuals with SCI, caregivers, and  
37 health professionals at each step, it will provide a framework to understand the most frequent met and  
38 unmet needs as reported by adults with traumatic and non traumatic SCI, their family caregivers, and  
39 their rehabilitation professionals across the continuum of care.  
40  
41  
42  
43  
44  
45  
46  
47  
48  
49  
50  
51  
52  
53  
54  
55  
56  
57  
58  
59  
60

1  
2 **a. Contributorship statement:** AM (preliminary literature review, drafting of the manuscript,  
3 integrations of the edits in the different versions, and manuscript submission), DZ (edits and feedback),  
4 CJ (edits and feedback), JB (database search), SA (edits and feedback).  
5  
6  
7

8  
9 **b. Competing interests:** None  
10

11 **c. Funding:** Lindsay foundation (INSPIRE). Fonds de la recherche du Québec-Santé (FRQS).  
12  
13 Networks of Centres of Excellence of Canada (AGE-WELL NCE).  
14

15  
16 **d. Data sharing statement:** N/A  
17  
18  
19  
20  
21  
22  
23  
24  
25  
26  
27  
28  
29  
30  
31  
32  
33  
34  
35  
36  
37  
38  
39  
40  
41  
42  
43  
44  
45  
46  
47  
48  
49  
50  
51  
52  
53  
54  
55  
56  
57  
58  
59  
60

## References

1. Government of Canada and Public Health Agency of Canada, *Mapping connections: an understanding of neurological conditions in Canada*. 2014.
2. Lenehan, B., et al., *The epidemiology of traumatic spinal cord injury in British Columbia, Canada*. Spine (Phila Pa 1976), 2012. **37**(4): p. 321-9.
3. Munce, S.E., et al., *Direct costs of adult traumatic spinal cord injury in Ontario*. Spinal Cord, 2013. **51**(1): p. 64-9.
4. Chen, H.Y. and J.R. Boore, *Living with a relative who has a spinal cord injury: a grounded theory approach*. Journal of Clinical Nursing, 2009. **18**(2): p. 174-82.
5. Hou, S. and A.G. Rabchevsky, *Autonomic consequences of spinal cord injury*. Compr Physiol, 2014. **4**(4): p. 1419-53.
6. Guilcher, S.J., et al., *Secondary health conditions and spinal cord injury: an uphill battle in the journey of care*. Disability & Rehabilitation, 2013. **35**(11): p. 894-906.
7. Craig, A., et al., *Prospective study of the occurrence of psychological disorders and comorbidities after spinal cord injury*. Archives of Physical Medicine & Rehabilitation, 2015. **96**(8): p. 1426-34.
8. Khazaeipour, Z., S.-M. Taheri-Otaghsara, and M. Naghdi, *Depression following spinal cord injury: its relationship to demographic and socioeconomic indicators*. Topics in Spinal Cord Injury Rehabilitation, 2015. **21**(2): p. 149-155 7p.
9. Williams, R. and A. Murray, *Prevalence of depression after spinal cord injury: a meta-analysis*. Arch Phys Med Rehabil, 2015. **96**(1): p. 133-40.
10. Lidal, I.B., et al., *Employment of persons with spinal cord lesions injured more than 20 years ago*. Disability and Rehabilitation: An International, Multidisciplinary Journal, 2009. **31**(26): p. 2174-2184.

11. Lidal, I.B., T.K. Huynh, and F. Biering-Sorensen, *Return to work following spinal cord injury: a review*. *Disabil Rehabil*, 2007. **29**(17): p. 1341-75.
12. Craven, C., et al., *Rehabilitation environmental scan atlas: capturing capacity in Canadian SCI rehabilitation*. 2012.
13. Dickson, A., et al., *The impact of assuming the primary caregiver role following traumatic spinal cord injury: An interpretative phenomenological analysis of the spouse's experience*. *Psychology & Health*, 2010. **25**(9): p. 1101-20.
14. Chiu, S., *Using triangulation methodology study on role strain and demands of family caregivers for spinal cord injury patients during discharge transition*. *Nursing Research* (10226265), 1998. **6**(6): p. 513-525 13p.
15. Middleton, J.W., et al., *Psychological distress, quality of life, and burden in caregivers during community reintegration after spinal cord injury*. *Archives of Physical Medicine & Rehabilitation*, 2014. **95**(7): p. 1312-9.
16. Nogueira, P.C., et al., [*Caregivers of individuals with spinal cord injury: caregiver burden*]. *Revista Da Escola de Enfermagem Da Usp*, 2013. **47**(3): p. 607-14.
17. Raj, J.T., C. Manigandan, and K.S. Jacob, *Leisure satisfaction and psychiatric morbidity among informal carers of people with spinal cord injury*. *Spinal Cord*, 2006. **44**(11): p. 676-9.
18. Ellenbogen, P.S., et al., *The impact of spinal cord injury on the employment of family caregivers*. *Journal of Vocational Rehabilitation*, 2006. **25**(1): p. 35-44.
19. Dickson, A., et al., *Adjustment and coping in spousal caregivers following a traumatic spinal cord injury: an interpretative phenomenological analysis*. *Journal of Health Psychology*, 2012. **17**(2): p. 247-57.
20. LaVela, S.L., et al., *Factors related to caregiving for individuals with spinal cord injury compared to caregiving for individuals with other neurologic conditions*. *Journal of Spinal Cord Medicine*, 2015. **38**(4): p. 505-14.

- 1  
2  
3  
4  
5  
6  
7  
8  
9  
10  
11  
12  
13  
14  
15  
16  
17  
18  
19  
20  
21  
22  
23  
24  
25  
26  
27  
28  
29  
30  
31  
32  
33  
34  
35  
36  
37  
38  
39  
40  
41  
42  
43  
44  
45  
46  
47  
48  
49  
50  
51  
52  
53  
54  
55  
56  
57  
58  
59  
60
21. Kroll, T., *Rehabilitative needs of individuals with spinal cord injury resulting from gun violence: the perspective of nursing and rehabilitation professionals*. Applied Nursing Research, 2008. **21**(1): p. 45-9.
22. Trezzini, B. and B. Phillips, *Impact of legal regulations and administrative policies on persons with SCI: identifying potential research priorities through expert interviews*. Disability & Rehabilitation, 2014. **36**(22): p. 1883-91.
23. Glass, C.A., K.R. Krishnan, and J.D. Bingley, *Spinal injury rehabilitation: do staff and patients agree on what they are talking about?* Paraplegia, 1991. **29**(5): p. 343-9.
24. Harvey, L.A., et al., *A comparison of patients' and physiotherapists' expectations about walking post spinal cord injury: a longitudinal cohort study*. Spinal Cord, 2012. **50**(7): p. 548-52.
25. Hammell, K.W., *Experience of rehabilitation following spinal cord injury: a meta-synthesis of qualitative findings*. Spinal Cord, 2007. **45**: p. 260-274.
26. Beauregard, L., et al., *Community needs of people living with spinal cord injury and their family*. Top Spinal Cord Inj Rehabil, 2012. **18**(2): p. 122-5.
27. van Loo, M.A., et al., *Care needs of persons with long-term spinal cord injury living at home in the Netherlands*. Spinal Cord, 2010. **48**(5): p. 423-8.
28. Sweet, S.N., et al., *Understanding quality of life in adults with spinal cord injury via SCI-related needs and secondary complications*. Top Spinal Cord Inj Rehabil, 2014. **20**(4): p. 321-8.
29. Noreau, L., et al., *Spinal cord injury community survey: a national, comprehensive study to portray the lives of Canadians with spinal cord injury*. Top Spinal Cord Inj Rehabil, 2014. **20**(4): p. 249-64.
30. Meade, M.A., et al., *A preliminary study of acute family needs after spinal cord injury: analysis and implications*. Rehabil Psychol, 2004. **49**(2): p. 150-155.
31. Smith, E.M., N. Boucher, and W.C. Miller, *Caregiving services in spinal cord injury: a systematic review of the literature*. Spinal Cord, 2016.

- 1  
2  
3  
4  
5  
6  
7  
8  
9  
10  
11  
12  
13  
14  
15  
16  
17  
18  
19  
20  
21  
22  
23  
24  
25  
26  
27  
28  
29  
30  
31  
32  
33  
34  
35  
36  
37  
38  
39  
40  
41  
42  
43  
44  
45  
46  
47  
48  
49  
50  
51  
52  
53  
54  
55  
56  
57  
58  
59  
60
32. Stiens, S.A., H.L. Fawber, and S.A. Yuhas, *The person with a spinal cord injury: an evolving prototype for life care planning*. Physical Medicine and Rehabilitation Clinics of North America, 2013. **24**(3): p. 419-+.
  33. Arksey, H. and L. O'Malley, *Scoping studies: towards a methodological framework*. International Journal of Social Research Methodology, 2005. **8**(1): p. 19-32.
  34. Maslow, A. and R. Frager, *Motivation and personality*. 1987, New York: Harper and Row.
  35. Ferrans, C.E., et al., *Conceptual model of health-related quality of life*. J Nurs Scholarsh, 2005. **37**(4): p. 336-42.
  36. Schubart, J.R., M. Hilgart, and C. Lyder, *Pressure ulcer prevention and management in spinal cord-injured adults: analysis of educational needs*. Advances in Skin & Wound Care, 2008. **21**(7): p. 322-9.
  37. Kennedy, P., P. Lude, and N. Taylor, *Quality of life, social participation, appraisals and coping post spinal cord injury: a review of four community samples*. Spinal Cord, 2006. **44**(2): p. 95-105.
  38. Taormina, R.J. and J.H. Gao, *Maslow and the motivation hierarchy: measuring satisfaction of the needs*. Am J Psychol, 2013. **126**(2): p. 155-77.
  39. Minshull, J., K. Ross, and J. Turner, *The human needs model of nursing*. J Adv Nurs, 1986. **11**(6): p. 643-9.
  40. Majercsik, E., *Hierarchy of needs of geriatric patients*. Gerontology, 2005. **51**(3): p. 170-3.
  41. Jackson, J.C., et al., *Improving patient care through the prism of psychology: application of Maslow's hierarchy to sedation, delirium, and early mobility in the intensive care unit*. J Crit Care, 2014. **29**(3): p. 438-44.
  42. Zalenski, R.J. and R. Raspa, *Maslow's hierarchy of needs: a framework for achieving human potential in hospice*. J Palliat Med, 2006. **9**(5): p. 1120-7.



- 1  
2  
3  
4  
5  
6  
7  
8  
9  
10  
11  
12  
13  
14  
15  
16  
17  
18  
19  
20  
21  
22  
23  
24  
25  
26  
27  
28  
29  
30  
31  
32  
33  
34  
35  
36  
37  
38  
39  
40  
41  
42  
43  
44  
45  
46  
47  
48  
49  
50  
51  
52  
53  
54  
55  
56  
57  
58  
59  
60
43. Calabro, L., *"First things first": Maslow's hierarchy as a framework for rebt in promoting disability adjustment during rehabilitation*. Journal of Rational-Emotive & Cognitive-Behavior Therapy, 1997. **15**(3): p. 193-213.
44. Scholzel-Dorenbos, C.J., E.J. Meeuwssen, and M.G. Olde Rikkert, *Integrating unmet needs into dementia health-related quality of life research and care: introduction of the hierarchy model of needs in dementia*. Aging Ment Health, 2010. **14**(1): p. 113-9.
45. Beran, D., *Developing a hierarchy of needs for Type 1 diabetes*. Diabet Med, 2014. **31**(1): p. 61-7.
46. Best, D., et al., *The hierarchy of needs and care planning in addiction services: what Maslow can tell us about addressing competing priorities?* Addiction Research & Theory, 2008. **16**(4): p. 305-307.
47. Henwood, B.F., et al., *Maslow and mental health recovery: a comparative study of homeless programs for adults with serious mental illness*. Adm Policy Ment Health, 2015. **42**(2): p. 220-8.
48. Ishikura, R. and N. Tashiro, *Frustration and fulfillment of needs in dissociative and conversion disorders*. Psychiatry Clin Neurosci, 2002. **56**(4): p. 381-90.
49. Bakas, T., et al., *Systematic review of health-related quality of life models*. Health Qual Life Outcomes, 2012. **10**: p. 134.
50. Manns, P.J. and L.A. May, *Perceptions of issues associated with the maintenance and improvement of long-term health in people with SCI*. Spinal Cord, 2007. **45**(6): p. 411-9.
51. Conti, A., et al., *Informal caregivers' needs on discharge from the spinal cord unit: analysis of perceptions and lived experiences*. Disabil Rehabil, 2016. **38**(2): p. 159-67.
52. McGowan, J., et al., *PRESS peer review of electronic search strategies: 2015 guideline statement*. J Clin Epidemiol, 2016.
53. Higgins, J. and S. Green, eds. *Cochrane handbook for systematic reviews of interventions Version 5.1.0 [updated March 2011]*. 2011, The Cochrane Collaboration.

- 1  
2 54. Levac, D., H. Colquhoun, and K.K. O'Brien, *Scoping studies: advancing the methodology*.  
3  
4 Implement Sci, 2010. 5: p. 69.  
5  
6  
7  
8  
9  
10  
11  
12  
13  
14  
15  
16  
17  
18  
19  
20  
21  
22  
23  
24  
25  
26  
27  
28  
29  
30  
31  
32  
33  
34  
35  
36  
37  
38  
39  
40  
41  
42  
43  
44  
45  
46  
47  
48  
49  
50  
51  
52  
53  
54  
55  
56  
57  
58  
59  
60

For peer review only

Figure 1. Maslow's hierarchy model of human needs

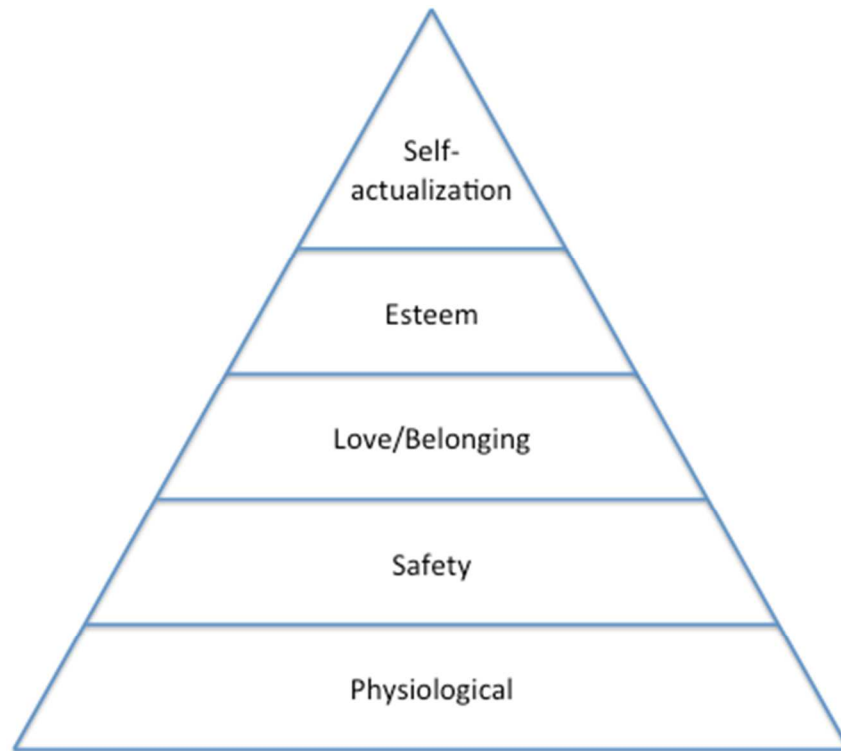

Review only

1  
2  
3  
4  
5  
6  
7  
8  
9  
10  
11  
12  
13  
14  
15  
16  
17  
18  
19  
20  
21  
22  
23  
24  
25  
26  
27  
28  
29  
30  
31  
32  
33  
34  
35  
36  
37  
38  
39  
40  
41  
42  
43  
44  
45  
46  
47  
48  
49  
50  
51  
52  
53  
54  
55  
56  
57  
58  
59  
60

Figure 2. Integrative approach towards SCI needs

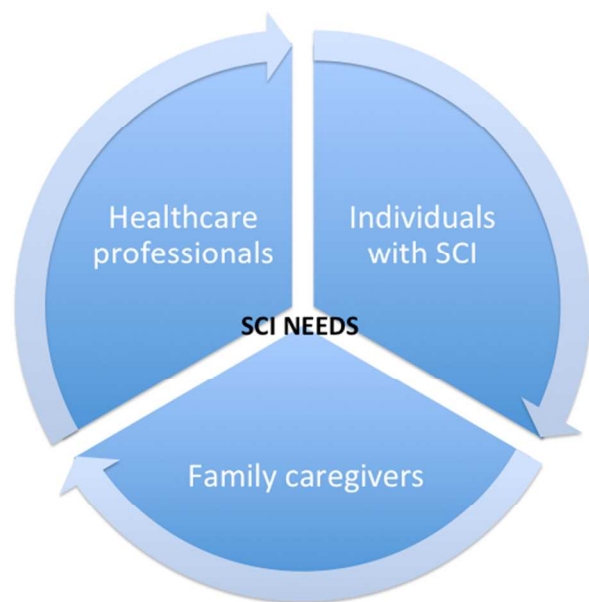

er review only

# BMJ Open

## Integrating the perspectives of individuals with spinal cord injuries, their family caregivers, and healthcare professionals across the continuum of care: protocol for a scoping study on SCI needs

|                                 |                                                                                                                                                                                                                                                                                                                                                                                                                                      |
|---------------------------------|--------------------------------------------------------------------------------------------------------------------------------------------------------------------------------------------------------------------------------------------------------------------------------------------------------------------------------------------------------------------------------------------------------------------------------------|
| Journal:                        | <i>BMJ Open</i>                                                                                                                                                                                                                                                                                                                                                                                                                      |
| Manuscript ID                   | bmjopen-2016-014331.R1                                                                                                                                                                                                                                                                                                                                                                                                               |
| Article Type:                   | Protocol                                                                                                                                                                                                                                                                                                                                                                                                                             |
| Date Submitted by the Author:   | 07-Feb-2017                                                                                                                                                                                                                                                                                                                                                                                                                          |
| Complete List of Authors:       | Moreno, Jhon; McGill University Faculty of Medicine, School of Physical and Occupational Therapy<br>Zidarov, Diana; McGill University, School of Physical and Occupational Therapy<br>Raju, Chandhana; McGill University, School of Physical and Occupational Therapy<br>Boruff, Jill; McGill University, Schulich Library of Science and Engineering<br>Ahmed, Sara; McGill University, School of Physical and Occupational Therapy |
| <b>Primary Subject Heading</b>: | Neurology                                                                                                                                                                                                                                                                                                                                                                                                                            |
| Secondary Subject Heading:      | Neurology                                                                                                                                                                                                                                                                                                                                                                                                                            |
| Keywords:                       | Spinal cord injury, Needs, Caregiver, Healthcare, Scoping study                                                                                                                                                                                                                                                                                                                                                                      |
|                                 |                                                                                                                                                                                                                                                                                                                                                                                                                                      |

SCHOLARONE™  
Manuscripts

only

1  
2  
3  
4  
5  
6  
7  
8  
9  
10  
11  
12  
13  
14  
15  
16  
17  
18  
19  
20  
21  
22  
23  
24  
25  
26  
27  
28  
29  
30  
31  
32  
33  
34  
35  
36  
37  
38  
39  
40  
41  
42  
43  
44  
45  
46  
47  
48  
49  
50  
51  
52  
53  
54  
55  
56  
57  
58  
59  
60

# Integrating the perspectives of individuals with spinal cord injuries, their family caregivers, and healthcare professionals across the continuum of care: protocol for a scoping study on SCI needs

Alexander Moreno<sup>1,2</sup>, Diana Zidarov<sup>1,2</sup>, Chandhana Raju<sup>1,2</sup>, Jill Boruff<sup>3</sup> & Sara Ahmed<sup>1,2</sup>

<sup>1</sup>Faculty of Medicine, School of Physical and Occupational Therapy, McGill University, CANADA

<sup>2</sup>Center for Interdisciplinary Research in Rehabilitation of Greater Montreal, CANADA

<sup>3</sup>Schulich Library of Science and Engineering, McGill University, CANADA

## Address for correspondence:

Sara Ahmed, Ph.D.

Center for Interdisciplinary Research in Rehabilitation (CRIR) – Constance-Lethbridge Rehabilitation

Centre, CIUSSS Centre-Ouest-de-l'Île-de-Montréal, 7005, Maisonneuve Blvd. West, Room 2-335

Email: [sara.ahmed@mcgill.ca](mailto:sara.ahmed@mcgill.ca)

**Institutional addresses and emails:**

Alexander Moreno, Ph.D.: Faculté des sciences humaines, Département de sexologie, Université du Québec à Montréal (UQÀM), C.P. 8888, Succ. Centre-Ville, Montréal, Québec, Canada, H3C-3P8.

Center for Interdisciplinary Research in Rehabilitation (CRIR) – Constance-Lethbridge Rehabilitation Centre, CIUSSS Centre-Ouest-de-l'Île-de-Montréal, 7005, Maisonneuve Blvd. West, Room 2-335.

Email: [moreno.jhon\\_alexander@uqam.ca](mailto:moreno.jhon_alexander@uqam.ca) ; [jhon.moreno@mail.mcgill.ca](mailto:jhon.moreno@mail.mcgill.ca)

Diana Zidarov, pht, Ph.D. Faculty of Medicine, School of Physical and Occupational Therapy, McGill University, 3654 Prom. Sir William Osler, Montreal, Quebec, Canada; Center for Interdisciplinary

Research in Rehabilitation (CRIR) – Constance-Lethbridge Rehabilitation Centre, CIUSSS Centre-

Ouest-de-l'Île-de-Montréal, 7005, Maisonneuve blvd West, Room 2-335 Email:

[diana.zidarov@mail.mcgill.ca](mailto:diana.zidarov@mail.mcgill.ca)

Chandhana Raju, B.S.: Constance-Lethbridge Rehabilitation Centre, CIUSSS Centre-Ouest-de-l'Île-de-Montréal, 7005, Maisonneuve Blvd. West, Room 2-335. Email: [chandhana.raju@mail.mcgill.ca](mailto:chandhana.raju@mail.mcgill.ca)

Jill Boruff, M.L.I.S.: Schulich Library of Science and Engineering, Macdonald-Stewart Library

Building 809 Sherbrooke Street West, Montreal, Quebec H3A 0C1. Email: [jill.boruff@mcgill.ca](mailto:jill.boruff@mcgill.ca)

Sara Ahmed, Ph.D.: Center for Interdisciplinary Research in Rehabilitation (CRIR) – Constance-Lethbridge Rehabilitation Centre, CIUSSS Centre-Ouest-de-l'Île-de-Montréal, Institut de réadaptation

Gingras-Lindsay-de-Montréal du CIUSSS du Centre-Est-de-l'Ile-de-Montréal, 7005, Maisonneuve blvd West, Room 2-335; Faculty of Medicine, School of Physical & Occupational Therapy, McGill

1  
2 University. 3654 Prom Sir-William-Osler, Montreal, QC, Canada, H3G 1Y5; McGill University Health  
3  
4 Center, Clinical Epidemiology, 687 Pine Ave W, Montreal, QC, Canada, H3A 1A1  
5  
6  
7

8  
9 Email: [sara.ahmed@mcgill.ca](mailto:sara.ahmed@mcgill.ca)  
10  
11

12  
13 Acknowledgements: This work was supported by a research grant awarded to Sara Ahmed from the  
14 Lindsay Rehabilitation Hospital Foundation (INSPIRE). Sara Ahmed is supported by a senior research  
15 scientist career award from the *Fonds de la recherche du Québec-Santé* (FRQS). Alexander Moreno is  
16 supported by a postdoctoral fellowship of the Networks of Centres of Excellence of Canada (AGE-  
17 WELL NCE) and from the Lindsay Rehabilitation Hospital Foundation. Diana Zidarov is supported by  
18 a Richard and Edith Strauss Post-Doctoral Fellowship from McGill University.  
19  
20  
21  
22  
23  
24  
25  
26  
27  
28  
29  
30  
31

32 **Word count: 4340**  
33  
34  
35  
36  
37  
38  
39  
40  
41  
42  
43  
44  
45  
46  
47  
48  
49  
50  
51  
52  
53  
54  
55  
56  
57  
58  
59  
60



## Abstract

**Introduction:** There is fragmented information about the different needs following a spinal cord injury (SCI). Expressed SCI needs can be met or unmet, they change along the rehabilitation continuum (e.g., acute, rehabilitation, and reintegration into the community), and can be different for traumatic and non-traumatic SCI. The general objective of this scoping study is to evaluate and integrate the needs of individuals with traumatic and non-traumatic SCI, their family caregivers, and those reported by rehabilitation professionals across the continuum from the time of rehabilitation admission to community reintegration. The specific objectives are to: a) synthesize the needs of individuals with SCI as perceived by themselves, their family caregivers, and rehabilitation professionals using two theoretical models, b) classify needs as met and unmet, c) explore the evolution of met/unmet needs across the continuum of care, and d) provide recommendations to improve SCI care.

**Methods and analysis:** a) identifying the most frequent met and unmet needs reported by adults with traumatic and non-traumatic SCI, their family caregivers, and their rehabilitation professionals across the continuum of care; b) identifying relevant studies with a search in electronic databases; c) charting the data based on categories refined and adjusted with a stakeholder group; d) collating, summarizing, and reporting the results two analytical frameworks (Maslow's hierarchical model of human needs and the Ferrans et al.'s model of Health-Related Quality of Life), and e) a stakeholder consultation phase.

**Ethics and dissemination:** The results of this scoping study will allow understanding SCI needs across the continuum of care from the perspective of different stakeholders. An integrated master report combining the needs of individuals with SCI from the perspectives of different stakeholders across the continuum of care will follow the consultation meetings.

1  
2  
3  
4  
5  
6  
7  
8  
9  
10  
11  
12  
13  
14  
15  
16  
17  
18  
19  
20  
21  
22  
23  
24  
25  
26  
27  
28  
29  
30  
31  
32  
33  
34  
35  
36  
37  
38  
39  
40  
41  
42  
43  
44  
45  
46  
47  
48  
49  
50  
51  
52  
53  
54  
55  
56  
57  
58  
59  
60

**Keywords:** Spinal Cord Injury, needs, caregiver, healthcare, scoping study.

For peer review only

## Introduction

Spinal Cord Injury (SCI) corresponds to a neurological condition affecting 330 to 400 per 100,000 Canadians living in the community<sup>1</sup>. According to provincial data, traumatic SCI affects mainly young and middle-aged adults, with men showing the highest prevalence regardless of age group (men-to-women ratio of 4.4:1)<sup>2</sup>. Traumatic SCI is concentrated in younger populations, while non traumatic SCI is condensed in older age groups<sup>3</sup>. In addition, Canadian estimates indicate that compared to non traumatic SCI (49%), the prevalence is higher for traumatic SCI (51%)<sup>3</sup>. Furthermore, SCI is a high-cost chronic disability<sup>4</sup> involving changes in roles, self-image, body function, social interactions, and family relationships<sup>5</sup>.

For individuals with SCI, the injury permanently transforms their lives. Indeed, SCI can result in diverse motor, sensory, and autonomic problems<sup>6</sup>. Mobility impairment (e.g., paraplegia, tetraplegia), bowel and bladder incontinence, loss of sensation, and sexual dysfunction are common following SCI<sup>7</sup>. As a result, individuals with SCI have complex health needs as their condition includes chronic multimorbidity, mainly associated with the development of several secondary health conditions (e.g., pain and pressure ulcers)<sup>7</sup>. In addition, compared to community estimates, higher rates of psychological disorders can be present in 17 to 25% of individuals with SCI<sup>8</sup>. Particularly, between 18-37% of individuals with SCI experience depression<sup>9,10</sup>.

Also, studies regarding long-term outcomes indicate that individuals with SCI have low employment rates 20 years post-injury<sup>11</sup>. A review shows that employment rates following SCI range from 11 to 69% depending on the definition of employment and differences in the study methodology<sup>12</sup>. Thus, SCI has an important functional, psychological, and social impact on individuals that requires an integrated care approach across the continuum from acute care to community living. For instance,

1  
2 Craven et al. (2012) stressed the need for lifetime access to rehabilitation healthcare for individuals  
3  
4 with SCI<sup>13</sup>. Individuals with SCI require follow-up to address their evolving health needs, including  
5  
6 the challenges that represent aging with a disability and the development of SCI-related secondary  
7  
8 health conditions.  
9

10  
11  
12  
13  
14 For families, the unforeseen nature of the injury leads some of the members into an “unexpected career”  
15  
16 as family caregivers<sup>14</sup>. As family caregivers normally do not have training for the caregiving tasks  
17  
18 (e.g., bathing, dressing, feeding), they can experience role transitions<sup>15</sup>, strain<sup>16</sup>, isolation<sup>7</sup>, burden<sup>17</sup>,  
19  
20 poor leisure satisfaction<sup>18</sup>, reduced ability to become and remain employed<sup>19</sup>, and marital disruption<sup>20</sup>.  
21  
22  
23

### 24 25 Different perspectives in SCI needs 26

27  
28 Individuals with SCI and their families, as well as healthcare professionals must work together to  
29  
30 effectively meet the diverse post-SCI needs<sup>21</sup>. For rehabilitation professionals, understanding the  
31  
32 interplay of different factors influencing support mechanisms to assist the transition to home and  
33  
34 community after discharge can facilitate social reintegration of the individual with SCI<sup>22</sup>. In fact,  
35  
36 rehabilitation professionals have an understanding of the needs and barriers that individuals with SCI  
37  
38 can encounter. Their observations are valuable as experts due to their professional roles with good  
39  
40 knowledge about the problems that individuals with SCI face<sup>23</sup>. Also, they can directly contribute to  
41  
42 the understanding of the rehabilitation process and the pre- and post-discharge challenges during  
43  
44 service delivery. For instance, shorter lengths of stay during inpatient rehabilitation can diminish the  
45  
46 opportunities to provide information and efficiently train dyads of individuals with SCI and their family  
47  
48 caregivers when they return to the community<sup>22</sup>. Thus, the healthcare professional’s perspective is  
49  
50 necessary when depicting a thorough picture of the barriers to meet the needs of individuals with SCI.  
51  
52 For instance, a study showed that compared to physiotherapists, some individuals with SCI have  
53  
54 unrealistically high expectations about walking one year post-injury<sup>24</sup>. Another study showed that  
55  
56  
57  
58  
59  
60

1  
2 when the perspectives of individuals with SCI are acknowledged during rehabilitation, they become  
3  
4 more committed to therapy, they express more confidence in their treating clinicians, and have better  
5  
6 satisfaction and outcomes <sup>25</sup>.  
7  
8

9  
10  
11 Compared to family caregivers of different neurological conditions, family caregivers of individuals  
12  
13 with SCI have experienced more frequent physical distress and present increased odds of coronary  
14  
15 heart disease and obesity <sup>26</sup>. Thus, their experience as family caregivers is crucial to understand the  
16  
17 needs of individuals with SCI, as they progressively become experts by experience while providing  
18  
19 care, supporting and addressing the needs of the care recipient with SCI. Family caregivers are an  
20  
21 important resource in the treatment of individuals with SCI considering that the quality of the care they  
22  
23 provide matches or exceeds the quality of professional care <sup>27</sup>. But unmet caregiver needs may prevent  
24  
25 optimal care and negatively affect the health of both the care recipients and their own. From a clinical  
26  
27 perspective, understanding the needs of individuals with SCI, knowing the person, and working with  
28  
29 the family can be beneficial to guide their healthcare and improve outcomes <sup>28</sup>. As unmet needs have a  
30  
31 direct relationship with diminished quality of life <sup>29</sup>, it is mandatory to understand them and to find  
32  
33 ways to meet them. In consequence, obtaining a comprehensive picture of needs by integrating the  
34  
35 different perspectives of professionals, family caregivers, and individuals with SCI is paramount.  
36  
37  
38  
39  
40  
41  
42  
43  
44

#### 45 Changing needs in the rehabilitation continuum

46  
47 The challenge is in understanding the evolution of these needs as they change over time. The literature  
48  
49 on SCI needs indicates that in the first year post-discharge, the fulfillment of critical needs (e.g.,  
50  
51 housing, transportation) is below 60% <sup>30</sup>, while the long-term care needed is higher than the care  
52  
53 received for information and psychosocial care needs <sup>31</sup>. Further, there are differences in needs between  
54  
55 individuals with traumatic and non-traumatic SCI. Compared to individuals with non traumatic SCI  
56  
57 (>70%), individuals with traumatic SCI (>85%) report more expressed needs on equipment and  
58  
59  
60

1  
2 technical aids, short-distance transportation, accessible housing, general healthcare, and SCI-  
3 specialized healthcare<sup>29</sup>. In addition, individuals with non traumatic SCI report more unmet needs in  
4 accessible housing, job training, and peer support<sup>32</sup>. Finally, fully addressing the needs of individuals'  
5 with SCI must include evaluating and targeting the needs of family caregivers. Family caregivers of  
6 individuals with SCI report health information needs as the most important and emotional support  
7 needs as those most often unmet<sup>33</sup>. Among the health and social consequences of unmet needs,  
8 individuals with SCI can present higher rates of multimorbidity<sup>7 34</sup>, dissatisfaction with their lives, high  
9 rates of psychological problems<sup>9</sup>, poor quality of life<sup>29</sup> and poor long-term integration into the  
10 community<sup>30</sup>. Also, unmet needs lead their family caregivers to invest more hours in their care<sup>27</sup>.

#### 25 Gaps in understanding met and unmet needs

26  
27  
28 Previous studies have evaluated SCI needs separately at different points of the rehabilitation continuum  
29 (e.g., inpatient, outpatient, and community) and with different types of SCI (e.g., traumatic versus non  
30 traumatic SCI, complete versus incomplete), from the perspective of individuals with SCI, family  
31 caregivers, and healthcare professionals. Further, studies have mainly considered SCI needs from a  
32 health services perspective rather than from a patient-centered perspective that accounts for areas that  
33 influence needs outside of the health system. To our knowledge there are no previous studies that have  
34 evaluated the variations in factors and synthesising these needs together from a patient-centered  
35 perspective. With fragmented information, it remains difficult for patients, family caregivers, health  
36 professionals, and researchers to understand the current gaps in SCI care and the most efficient ways to  
37 deliver care that are most likely to address unmet needs.  
38  
39  
40  
41  
42  
43  
44  
45  
46  
47  
48  
49  
50

51  
52  
53  
54 The objective of this study is to review the literature on SCI needs using a scoping study approach  
55 given the diffuse literature on SCI needs. Scoping studies allow for an appraisal of the literature and  
56 have four objectives<sup>35</sup>: a) to examine the extent, range, and nature of the research activity, b) to  
57  
58  
59  
60

1  
2 determine the value of conducting a systematic review, c) to summarize and disseminate research  
3 findings, and d) to identify gaps in the literature. This methodological strategy was chosen because  
4 compared to systematic reviews, scoping studies address broader topics and questions where different  
5 study designs are used, they intend to rapidly map the key concepts of a research area, and they  
6 encompass a comprehensive coverage of the literature (breadth more than in-depth). This scoping study  
7 will provide broad understanding and synthesis of SCI needs as reported by different stakeholders, for  
8 traumatic and non-traumatic SCI, across the care continuum. This scoping study will help us to identify  
9 unexplored areas of SCI needs and to provide recommendations to improve the quality of health  
10 services, to inform the development of new interventions to address unmet needs.  
11  
12  
13  
14  
15  
16  
17  
18  
19  
20  
21  
22  
23  
24  
25

#### 26 Theoretical frameworks to guide the evaluation of unmet needs

27  
28 SCI needs will be synthesised based on two guiding theoretical frameworks: a) the conceptual  
29 framework of Maslow's *hierarchy model of needs* coming from humanistic psychology <sup>36</sup> and the  
30 Ferrans et al.'s model of Health-Related Quality of Life (HRQoL), which is a modified version of the  
31 Wilson and Cleary model of HRQoL <sup>37</sup>. Both the Maslow's model and the Ferrans et al.'s model are  
32 informative and appropriate to frame SCI needs taking into account the perspectives of different  
33 stakeholders.  
34  
35  
36  
37  
38  
39  
40  
41  
42  
43  
44

45 The definition of needs has been variable across published studies. Some of them define needs as the  
46 discrepancies between what is desired or optimal based on a guideline, and what is actually occurring <sup>38</sup>,  
47 a circumstance requiring a course of action <sup>39</sup>, or services that are necessary to support individual's  
48 community living <sup>29</sup>. For the current scoping study, a broader definition of needs corresponds to a lack  
49 of something that is essential to a person's existence or well-being, according to Maslow's hierarchical  
50 model <sup>40</sup>. In his groundbreaking theory of motivation, Maslow describes human needs as being  
51 hierarchical. Figure 1 depicts the pyramidal representation of human needs. As described in his theory,  
52  
53  
54  
55  
56  
57  
58  
59  
60

1  
2 human needs can be classified in five levels: a) physiological needs, b) safety and security needs, c)  
3  
4 belonging and love needs, d) esteem needs, and e) self-actualization needs. In healthcare, the  
5  
6 hierarchical model of needs has been applied to nursing <sup>41</sup>, geriatric care <sup>42</sup>, intensive care <sup>43</sup>, palliative  
7  
8 care <sup>44</sup>, disability and rehabilitation <sup>45</sup>, as well as to specific conditions such as dementia <sup>46</sup>, type 1  
9  
10 diabetes <sup>47</sup>, addiction <sup>48</sup>, homeless adults with serious mental illness <sup>49</sup>, and dissociative and conversion  
11  
12 disorders <sup>50</sup>. Although some of these needs cannot be provided by the health system, the use of this  
13  
14 framework has been useful to prioritize, conceptualize and understand needs, to develop a more  
15  
16 humanistic approach to successful healthcare, to support person-centered care planning, and to redefine,  
17  
18 change and improve the culture of care.  
19  
20  
21  
22  
23  
24

25  
26 Given that a SCI impacts all domains of the person's life (physical, social, psychological), needs are  
27  
28 not only related to the characteristics of the individual but also the environment the person lives in.  
29  
30 Therefore the Ferrans et al's model of HRQoL complements Maslow's model as it provides a guide for  
31  
32 understanding characteristics of the individual (that are mainly encompassed in the hierarchy model of  
33  
34 needs), but also the environmental component (e.g., physical and social environment), as well as  
35  
36 health-related domains that influence general health perceptions and quality of life (e.g., symptoms,  
37  
38 function, and participation) that need to be addressed when making evidence-based recommendations  
39  
40 regarding unmet SCI needs <sup>51</sup>. Thus, both theoretical models will provide an understanding of the  
41  
42 dynamics between the motivational aspects associated with SCI-needs (Maslow) and the environmental  
43  
44 influences on the HRQoL of individuals with SCI (Ferrans et al.), given that unmet needs have a direct  
45  
46 relationship with diminished quality of life <sup>29</sup>.  
47  
48  
49  
50  
51  
52  
53

54 Figure 1. Maslow's hierarchy model of human needs  
55  
56  
57  
58  
59  
60



---

Insert Figure 1 here

---

1  
2  
3  
4  
5  
6  
7  
8  
9  
10  
11  
12  
13  
14  
15  
16  
17  
18  
19  
20  
21  
22  
23  
24  
25  
26  
27  
28  
29  
30  
31  
32  
33  
34  
35  
36  
37  
38  
39  
40  
41  
42  
43  
44  
45  
46  
47  
48  
49  
50  
51  
52  
53  
54  
55  
56  
57  
58  
59  
60

In summary, as studies about SCI needs are conducted in different points of the rehabilitation continuum (e.g., inpatient, outpatient, and community) and with different types of injuries (e.g., traumatic versus non traumatic SCI, complete versus incomplete), a scoping study approach integrating the different perspectives of healthcare professionals, family caregivers, and individuals with SCI, guided by the Maslow and the Ferrans et al's models can help to depict a comprehensive picture of their needs. SCI needs are ongoing and they change in the rehabilitation continuum over the years<sup>52</sup>. In the very stressful period of the acute phase, SCI needs are not the same because both the families and individuals with SCI need time to adjust to their new reality following the injury, whereas outside the rehabilitation center SCI needs change depending on the path that individuals follow<sup>53</sup>. This scoping study will help to identify research gaps regarding SCI needs across the continuum of care and to holistically understand the met and unmet needs to improve healthcare with an integrative approach including different perspectives (see figure 2).

Figure 2. Integrative approach towards SCI needs

---

Insert Figure 2 here

---

## Methods

The current scoping study will use the methodology described by Arksey and O'Malley (2005)<sup>35</sup>.

### *Step 1. Identifying the research question*

1  
2 The research question guiding the current scoping study is “Which are the most frequent met and  
3  
4 unmet needs (e.g., information needs, home support needs, personal care needs, respite needs,  
5  
6 psychological support needs, educational needs, employment needs, sexuality needs, technological  
7  
8 needs, telerehabilitation needs, spiritual needs, among others) reported by adults with traumatic and  
9  
10 non traumatic SCI, their family caregivers, and their rehabilitation professionals across the continuum  
11  
12 of care?”  
13  
14

15  
16  
17  
18 Specifically, the current scoping study has four objectives:  
19

- 20  
21  
22  
23 1. To synthesize the needs of individuals with SCI as perceived by themselves, their family  
24  
25 caregivers, and their rehabilitation professionals according to the categories of the hierarchy of  
26  
27 human needs and the Ferrans et al.’s model of HRQoL.  
28  
29
- 30  
31 2. To classify needs as met and unmet.  
32
- 33  
34 3. To explore the evolution of met/unmet needs across the continuum of care, from the time of  
35  
36 rehabilitation admission to the community integration.  
37
- 38  
39 4. To provide recommendations to improve SCI care.  
40  
41

#### 42 *Step 2. Identifying eligible studies*

43  
44 We will search published articles with the following inclusion criteria: a) publications from all health  
45  
46 professions, b) describing different needs in both traumatic and non traumatic SCI, c) participants with  
47  
48 18 years of age and older, d) from acute to chronic injuries, e) the timeframe of publication will be  
49  
50 limited to the last 20 years (1997 to 2017), f) qualitative, quantitative studies, and case reports, g)  
51  
52 available in English language, and h) grey literature defined as any documentary material that is non  
53  
54 commercially published such as technical reports, thesis’ repositories, materials produced by  
55  
56 associations and the industry, government documents, and working papers<sup>54</sup>. We will exclude: a)  
57  
58  
59  
60

conference abstracts, b) articles published in other languages, and c) studies addressing paediatric populations.

### *Search strategy and information sources*

A health science librarian (JB) developed the search strategy for Ovid Medline (Table 1) and had it peer reviewed by another librarian per the PRESS standard<sup>55</sup>. As health system issues often change with models of care delivery, the economic climate, and the environment, we have decided to narrow the scope to the past 20 years (1997 to present). This search strategy will be adapted for subsequent databases. The following databases will be searched with no date or language limits applied: Ovid Medline®, CINAHL, EMBASE, PsycINFO, Cochrane Library, Web of Science, ProQuest Dissertations and Theses. We will do hand searches of the reference lists of the selected articles to ensure that we have not missed any relevant information.

Grey literature will be searched on SCI websites, scientific and professional associations, and also using search engines on the Internet (e.g., Google and Yahoo). When using search engines, we will retain the first 50 results for the analysis given the amount of information available.

Table 1. Search strategy for Ovid MEDLINE(R) In-Process & Other Non-Indexed Citations, Ovid MEDLINE(R) Daily and Ovid MEDLINE(R) 1997 to present

|   |                           |
|---|---------------------------|
| 1 | exp Spinal Cord Injuries/ |
| 2 | spinal cord injur*.tw,kf. |
| 3 | exp Paraplegia/           |
| 4 | Quadriplegia/             |
| 5 | tetraplegia.tw,kf.        |
| 6 | paraplegia.tw,kf.         |
| 7 | Quadriplegia.tw,kf.       |

|    |                                                                                                                                                                                                                                                                                                                                                                                                                                                                                                                                                   |
|----|---------------------------------------------------------------------------------------------------------------------------------------------------------------------------------------------------------------------------------------------------------------------------------------------------------------------------------------------------------------------------------------------------------------------------------------------------------------------------------------------------------------------------------------------------|
| 8  | spinal column injur*.tw,kf.                                                                                                                                                                                                                                                                                                                                                                                                                                                                                                                       |
| 9  | central cord injur*.tw,kf.                                                                                                                                                                                                                                                                                                                                                                                                                                                                                                                        |
| 10 | 1 or 2 or 3 or 4 or 5 or 6 or 7 or 8 or 9                                                                                                                                                                                                                                                                                                                                                                                                                                                                                                         |
| 11 | ((met or unmet or expressed) adj3 (need or needs)).tw,kf.                                                                                                                                                                                                                                                                                                                                                                                                                                                                                         |
| 12 | Needs Assessment/                                                                                                                                                                                                                                                                                                                                                                                                                                                                                                                                 |
| 13 | "Health Services Needs and Demand"/                                                                                                                                                                                                                                                                                                                                                                                                                                                                                                               |
| 14 | Patient Preference/                                                                                                                                                                                                                                                                                                                                                                                                                                                                                                                               |
| 15 | Patient Satisfaction/                                                                                                                                                                                                                                                                                                                                                                                                                                                                                                                             |
| 16 | (sexual* adj2 (concern* or satisfaction or need or needs)).tw,kf.                                                                                                                                                                                                                                                                                                                                                                                                                                                                                 |
| 17 | ((caregiver* or famil* or spouse* or person* or patient* or client* or individual* or user* or research) adj3 (priorities or expectation* or preference* or perspective*)).tw,kf.                                                                                                                                                                                                                                                                                                                                                                 |
| 18 | ((self-actualization or self-esteem or esteem or spiritual or belonging or love or physiological or security or caregiver* or famil* or spouse* or transportation or support or social or economic or health or life or telerehabilitation or rehabilitation or rehabilitative or information or economic or emotional or community or home or personal care or respite or psychological or instrumental or safety or health care or healthcare or educational or employment or leisure or housing or technological) adj3 (need or needs)).tw,kf. |
| 19 | 11 or 12 or 13 or 14 or 15 or 16 or 17 or 18                                                                                                                                                                                                                                                                                                                                                                                                                                                                                                      |
| 20 | self concept/ or self efficacy/                                                                                                                                                                                                                                                                                                                                                                                                                                                                                                                   |
| 21 | (satisfaction or needs).tw,kf.                                                                                                                                                                                                                                                                                                                                                                                                                                                                                                                    |
| 22 | 20 and 21                                                                                                                                                                                                                                                                                                                                                                                                                                                                                                                                         |
| 23 | 19 or 22                                                                                                                                                                                                                                                                                                                                                                                                                                                                                                                                          |
| 24 | 10 and 23                                                                                                                                                                                                                                                                                                                                                                                                                                                                                                                                         |
| 25 | limit 24 to yr="1997 -Current"                                                                                                                                                                                                                                                                                                                                                                                                                                                                                                                    |

### Step 3: Study selection

In the first step, a reference management software (EndNote X7) will be used to merge the results and remove the duplicates before screening the abstracts. Later, a data extraction form will be developed by the research team to screen the abstracts based on the eligibility criteria described in step 2. Two independent reviewers will conduct the selection of abstracts starting with a pilot phase involving the examination of the first 20 titles and abstracts to screen and decide the retention of the abstract based on the inclusion criteria. The results of the independent ratings will be recorded separately using the data extraction form. Inter-rater agreement will be assessed using the kappa statistic<sup>56</sup>. Inter-rater agreement below 75% will lead to a revision and clarification of the eligibility criteria. The process will

1  
2 be repeated until an agreement of 75% will be reached, which is evidence of excellent agreement. This  
3  
4 is important as it is recommended that discussions are being held regarding the challenges and  
5  
6 uncertainties related to study selection and to refine the search strategy as needed <sup>57</sup>. Finally, all eligible  
7  
8 studies and those classified as unclear (i.e., requiring further information to make a final decision  
9  
10 regarding their retention) will be independently reviewed as full-text articles. Inter-rater agreement will  
11  
12 be re-assessed using the kappa statistic <sup>56</sup> on a random sample of 10 publications. Disagreements at this  
13  
14 stage will be resolved by consensus. In case of persistent disagreement, a third reviewer will be  
15  
16 consulted to determine the final inclusion.  
17  
18  
19  
20

#### 21 22 23 *Step 4. Data extraction process*

24  
25 The data extracted in the previous step will include the information corresponding to author(s), year of  
26  
27 publication, country of origin and context (where the study was conducted), status of publication (e.g.,  
28  
29 published or grey literature), journal, aims/purpose, study population (individuals with SCI, family  
30  
31 caregivers, rehabilitation professionals) and sample size (if applicable), SCI type (traumatic and non  
32  
33 traumatic), level(s) of care (acute, primary care, community), time since SCI, methodology/methods  
34  
35 (study design, measures), key findings that relate to the scoping study question/s (in terms of met and  
36  
37 unmet specific categories of needs). At this stage, two independent reviewers will extract the  
38  
39 information based on the first 10 publications. Also, during the charting of the information, the  
40  
41 reviewers will meet following the extraction of the first 10 studies to make sure that the data extraction  
42  
43 follows consistently the purpose of the study. A meeting to evaluate the consistency of the information  
44  
45 extracted will allow the reviewers to identify inconsistencies and make decisions regarding the best  
46  
47 way to deal with ambiguity.  
48  
49  
50  
51  
52  
53  
54  
55  
56  
57  
58  
59  
60

1  
2 An iterative process consisting of inter-reviewer discussions held at the beginning, in the middle and at  
3  
4 the end of the extraction will lead to a consensus regarding the best way to extract the data. When  
5  
6 disagreements persist, a third independent reviewer will be consulted.  
7  
8  
9

#### 10 11 *Step 5. Data synthesis* 12

13  
14 This phase involves collating, summarizing, and reporting the results. Compared to systematic reviews,  
15  
16 scoping studies present a narrative account of a potentially large body of material <sup>35</sup>. Thus, guided by  
17  
18 the previous theoretical frameworks, we intend to identify a descriptive numerical summary (e.g.,  
19  
20 characteristics of included studies, types of study design, characteristics of the study population,  
21  
22 geographical location) and emerging themes (deductive thematic analysis) <sup>57</sup>. Using as an analytical  
23  
24 framework the Maslow's hierarchical model of human needs, we will extract the main themes  
25  
26 corresponding to the five categories of human needs and classify them as described by professionals,  
27  
28 family caregivers, and individuals with SCI. Similarly, met and unmet SCI needs will be classified  
29  
30 based on the Ferrans et al.'s model of HRQoL as characteristics of the individual and characteristics of  
31  
32 the environment, and their relationship with other components (e.g., biological function, symptoms,  
33  
34 functional status, general health perceptions, and overall quality of life). We will create a matrix that  
35  
36 integrates the themes identified for the Maslow's and Ferrans et al.'s model that will allow us to  
37  
38 explore the relationship between personal and environmental factors (Ferrans et al.'s model) that  
39  
40 influence needs (Maslow model). The matrix will allow the identification and intergroup comparison of  
41  
42 the met/unmet needs for each one of the groups (e.g., adults with traumatic and non traumatic SCI,  
43  
44 their family caregivers, and their rehabilitation professionals). Following the thematic analysis, special  
45  
46 considerations regarding the implications for research, policy and practice will be presented. Thus, the  
47  
48 analysis will include both individual and environmental influences of quality of life because SCI needs  
49  
50 can be unmet at different points of the continuum of care as a consequence of subjective (e.g.,  
51  
52  
53  
54  
55  
56  
57  
58  
59  
60

1  
2 motivation, beliefs, and attitudes) and environmental barriers (e.g., administrative issues, financial  
3  
4 limitations, limitations of health policies, among others).  
5  
6  
7

8  
9 *Step 6: Stakeholder consultation*  
10

11 The objective of this stage is to start translating knowledge into practice by disseminating results  
12 among potential knowledge users. Given the extensive information that will be synthesised and the  
13 diverse perspectives involved, we will request input from stakeholders at each step, and for each  
14 document/process that is developed for data extraction and synthesis. Therefore, stakeholder  
15 consultations will be held at the beginning of the process (requesting feedback to refine the research  
16 question, further refine the Ferrans et al.'s model relative to Maslow's model to focus data extraction  
17 and synthesis), during the study (validate the data extraction, decide the best way to align the  
18 information with stakeholders' needs), two to three times during data synthesis, and when preliminary  
19 or final results are available (knowledge mobilisation). Having information about SCI met and unmet  
20 needs will help stakeholders to prioritize different needs, based on the conclusions of the scoping  
21 review. Thus, stakeholders will benefit from the results and will be able to focus their efforts based on  
22 informed decisions about the different SCI needs. The current scoping review will permit to write an  
23 integrated master report combining the needs of individuals with SCI from the perspectives of different  
24 stakeholders across the continuum of care. However, our knowledge translation plan will include  
25 extracting end-user specific information from the master report for each targeted group (i.e., adults with  
26 traumatic and non traumatic SCI, their family caregivers, and their rehabilitation professionals). For the  
27 current scoping study, relevant stakeholders include support groups of individuals with SCI and their  
28 family caregivers, clinicians, and decision-makers. The meetings will be organized either in a face-to-  
29 face format or using videoconference to allow broader participation, giving equal representation to the  
30 different groups.  
31  
32  
33  
34  
35  
36  
37  
38  
39  
40  
41  
42  
43  
44  
45  
46  
47  
48  
49  
50  
51  
52  
53  
54  
55  
56  
57  
58  
59  
60

## Discussion

The current scoping study will answer the question about the most frequent met and unmet needs reported by adults with traumatic and non traumatic SCI, their family caregivers, and their rehabilitation professionals across the continuum of care. The results of the current scoping study could have implications from different viewpoints: a) rehabilitation can be informed from the synthesis of SCI needs because clinicians can become more sensitive as they increase awareness about the complexity of SCI expressed and unmet needs across the continuum of care, b) service provision could be modified from gaining understanding about the gap between unmet and expressed needs, c) the view of rehabilitation as a changing process with evolving needs in different phases of care can help clinicians to understand and modify their practice when considering SCI needs as dynamic in different stages of care, d) the conception of new studies can be informed based on our comprehensive picture of SCI needs as it will suggest priorities in the research agenda, e) the development of new interventions could benefit from our conclusions as they will provide information to help to make informed decisions to address the most important unmet needs as outcomes, and f) policy makers could benefit from these results as they will be able to implement modifications to existent programs to adjust to the complexities of the interactions among different stakeholders involved in the provision of services to increase SCI needs satisfaction.

Scoping studies have some methodological limitations that include the fact that the quality of the evidence is not appraised. Compared to systematic reviews where the quality appraisal and the relative weight of evidence in favour or against a specific intervention is very important, scoping studies are descriptive and narrative<sup>35</sup>. However, scoping studies provide valid specific research questions needing a systematic review through a careful process of scrutinizing evidence coming from different methodologies and study designs. Also, scoping studies are not a short summary of many articles and,



1  
2 as such, they use frameworks or themes to articulate their findings<sup>57</sup>. For the current scoping study, the  
3  
4 theoretical frameworks guiding the analysis of the information have been carefully chosen and  
5  
6 weighted against other competing models. However, we are aware that the findings could be  
7  
8 interpreted using alternative analytical frameworks.  
9

10  
11  
12  
13  
14 A few limitations regarding the search strategy need to be acknowledged. The search strategy includes  
15  
16 the use of different keywords to address needs, SCI, and the three groups of stakeholders that we would  
17  
18 like to target (e.g., individuals with SCI, their family caregivers, and their rehabilitation professionals).  
19  
20 However, even when we have clearly widened the keywords, it is possible that alternative terms could  
21  
22 make that some of the peer-reviewed literature could not be captured. To overcome this limitation, we  
23  
24 have the support of an experienced librarian in health sciences; iterative discussions led to the  
25  
26 refinement of the search strategy to avoid missing important pieces of information that could be vital to  
27  
28 respond to the research question. At the same time, the search strategy has been keenly refined to avoid  
29  
30 having an unmanageable number of references. In addition, scoping studies involve practical issues  
31  
32 related to time, funding, and access to resources that must be considered when finding the balance  
33  
34 between feasibility, breadth, and comprehensiveness<sup>57</sup>.  
35  
36  
37  
38  
39  
40  
41

42 Issues associated with the resource implications represent the fact that even if scoping studies provide a  
43  
44 rapid appraisal and mapping of a specific field, it is wrong to assume that they are a quick or cheap  
45  
46 option, with some cases reporting the full-time involvement of at least three staff members and the  
47  
48 librarian for six consecutive months, with the study protocol as the starting point<sup>35</sup>. Thus, these studies  
49  
50 involve costs regarding the staff involved, the informatics resources needed, and the time demanded in  
51  
52 the selection of the studies by staff with the scientific qualifications required to critically select the  
53  
54 information and optimally chart the data. For the current scoping study, the experience of our lab in this  
55  
56 kind of studies, as well as the scientific qualifications of our staff (e.g., healthcare professionals,  
57  
58  
59  
60

1  
2 graduate students, postdoctoral fellows, and researchers), make it feasible considering the high levels of  
3  
4 analytic skills needed.  
5  
6  
7  
8

9 In conclusion, this study protocol presents the rationale and methodology for a scoping study on SCI  
10 needs. Through a rigorous and transparent method, engaging individuals with SCI, family caregivers,  
11 and health professionals at each step, it will provide a framework to understand the most frequent met  
12 and unmet needs as reported by adults with traumatic and non traumatic SCI, their family caregivers,  
13 and their rehabilitation professionals across the continuum of care.  
14  
15  
16  
17  
18  
19  
20  
21  
22  
23  
24  
25  
26  
27  
28  
29  
30  
31  
32  
33  
34  
35  
36  
37  
38  
39  
40  
41  
42  
43  
44  
45  
46  
47  
48  
49  
50  
51  
52  
53  
54  
55  
56  
57  
58  
59  
60

1  
2  
3  
4  
5  
6  
7  
8  
9  
10  
11  
12  
13  
14  
15  
16  
17  
18  
19  
20  
21  
22  
23  
24  
25  
26  
27  
28  
29  
30  
31  
32  
33  
34  
35  
36  
37  
38  
39  
40  
41  
42  
43  
44  
45  
46  
47  
48  
49  
50  
51  
52  
53  
54  
55  
56  
57  
58  
59  
60

**a. Contributorship statement:** Alexander Moreno, Ph.D (conception and design, preliminary literature review, drafting of the manuscript, integrations of the edits in the different versions, and manuscript submission), Diana Zidarov, Ph.D. (edits and feedback), Chandana Raju M.S. (edits and feedback), Jill Boruff, MLIS, AHIP (database search), Sara Ahmed, Ph.D. (conception and design, edits and feedback).

**b. Competing interests:** None

**c. Funding:** Lindsay foundation (INSPIRE). Fonds de la recherche du Québec-Santé (FRQS). Networks of Centres of Excellence of Canada (AGE-WELL NCE).

**d. Data sharing statement:** N/A

## References

1. Government of Canada, Public Health Agency of Canada. Mapping connections: an understanding of neurological conditions in Canada. 2014
2. Lenehan B, Street J, Kwon BK, et al. The epidemiology of traumatic spinal cord injury in British Columbia, Canada. *Spine (Phila Pa 1976)* 2012;37(4):321-9. doi: 10.1097/BRS.0b013e31822e5ff8
3. Noonan VK, Fingas M, Farry A, et al. Incidence and prevalence of spinal cord injury in Canada: a national perspective. *Neuroepidemiology* 2012;38(4):219-26. doi: 10.1159/000336014
4. Munce SE, Wodchis WP, Guilcher SJ, et al. Direct costs of adult traumatic spinal cord injury in Ontario. *Spinal Cord* 2013;51(1):64-9. doi: <http://dx.doi.org/10.1038/sc.2012.81>
5. Chen HY, Boore JR. Living with a relative who has a spinal cord injury: a grounded theory approach. *J Clin Nurs* 2009;18(2):174-82. doi: <http://dx.doi.org/10.1111/j.1365-2702.2008.02355.x>
6. Hou S, Rabchevsky AG. Autonomic consequences of spinal cord injury. *Compr Physiol* 2014;4(4):1419-53. doi: 10.1002/cphy.c130045
7. Guilcher SJ, Craven BC, Lemieux-Charles L, et al. Secondary health conditions and spinal cord injury: an uphill battle in the journey of care. *Disability & Rehabilitation* 2013;35(11):894-906. doi: <http://dx.doi.org/10.3109/09638288.2012.721048>
8. Craig A, Nicholson Perry K, Guest R, et al. Prospective study of the occurrence of psychological disorders and comorbidities after spinal cord injury. *Arch Phys Med Rehabil* 2015;96(8):1426-34. doi: <http://dx.doi.org/10.1016/j.apmr.2015.02.027>
9. Khazaeipour Z, Taheri-Otaghsara S-M, Naghdi M. Depression following spinal cord injury: its relationship to demographic and socioeconomic indicators. *Topics in Spinal Cord Injury Rehabilitation* 2015;21(2):149-55 7p. doi: 10.1310/sci2102-149
10. Williams R, Murray A. Prevalence of depression after spinal cord injury: a meta-analysis. *Arch Phys Med Rehabil* 2015;96(1):133-40. doi: 10.1016/j.apmr.2014.08.016

- 1  
2  
3  
4  
5  
6  
7  
8  
9  
10  
11  
12  
13  
14  
15  
16  
17  
18  
19  
20  
21  
22  
23  
24  
25  
26  
27  
28  
29  
30  
31  
32  
33  
34  
35  
36  
37  
38  
39  
40  
41  
42  
43  
44  
45  
46  
47  
48  
49  
50  
51  
52  
53  
54  
55  
56  
57  
58  
59  
60
11. Lidal IB, Hjeltnes N, Roislien J, et al. Employment of persons with spinal cord lesions injured more than 20 years ago. *Disability and Rehabilitation: An International, Multidisciplinary Journal* 2009;31(26):2174-84. doi: <http://dx.doi.org/10.3109/09638280902946952>
12. Lidal IB, Huynh TK, Biering-Sorensen F. Return to work following spinal cord injury: a review. *Disabil Rehabil* 2007;29(17):1341-75. doi: 10.1080/09638280701320839
13. Craven C, Verrier M, Balioussis C, et al. Rehabilitation environmental scan atlas: capturing capacity in Canadian SCI rehabilitation, 2012.
14. Dickson A, O'Brien G, Ward R, et al. The impact of assuming the primary caregiver role following traumatic spinal cord injury: An interpretative phenomenological analysis of the spouse's experience. *Psychol Health* 2010;25(9):1101-20. doi: <http://dx.doi.org/10.1080/08870440903038949>
15. Chiu S. Using triangulation methodology study on role strain and demands of family caregivers for spinal cord injury patients during discharge transition. *Nursing Research (10226265)* 1998;6(6):513-25 13p.
16. Middleton JW, Simpson GK, De Wolf A, et al. Psychological distress, quality of life, and burden in caregivers during community reintegration after spinal cord injury. *Arch Phys Med Rehabil* 2014;95(7):1312-9. doi: <http://dx.doi.org/10.1016/j.apmr.2014.03.017>
17. Nogueira PC, Rabeh SA, Caliri MH, et al. [Caregivers of individuals with spinal cord injury: caregiver burden]. *Rev Esc Enferm USP* 2013;47(3):607-14.
18. Raj JT, Manigandan C, Jacob KS. Leisure satisfaction and psychiatric morbidity among informal carers of people with spinal cord injury. *Spinal Cord* 2006;44(11):676-9.
19. Ellenbogen PS, Meade MA, Jackson M, et al. The impact of spinal cord injury on the employment of family caregivers. *Journal of Vocational Rehabilitation* 2006;25(1):35-44.

- 1  
2  
3  
4  
5  
6  
7  
8  
9  
10  
11  
12  
13  
14  
15  
16  
17  
18  
19  
20  
21  
22  
23  
24  
25  
26  
27  
28  
29  
30  
31  
32  
33  
34  
35  
36  
37  
38  
39  
40  
41  
42  
43  
44  
45  
46  
47  
48  
49  
50  
51  
52  
53  
54  
55  
56  
57  
58  
59  
60
20. Dickson A, O'Brien G, Ward R, et al. Adjustment and coping in spousal caregivers following a traumatic spinal cord injury: an interpretative phenomenological analysis. *J Health Psychol* 2012;17(2):247-57. doi: <http://dx.doi.org/10.1177/1359105311411115>
21. Glass CA, Krishnan KR, Bingley JD. Spinal injury rehabilitation: do staff and patients agree on what they are talking about? *Paraplegia* 1991;29(5):343-9.
22. Kroll T. Rehabilitative needs of individuals with spinal cord injury resulting from gun violence: the perspective of nursing and rehabilitation professionals. *Appl Nurs Res* 2008;21(1):45-9. doi: <http://dx.doi.org/10.1016/j.apnr.2006.06.001>
23. Trezzini B, Phillips B. Impact of legal regulations and administrative policies on persons with SCI: identifying potential research priorities through expert interviews. *Disability & Rehabilitation* 2014;36(22):1883-91. doi: <http://dx.doi.org/10.3109/09638288.2014.881564>
24. Harvey LA, Adams R, Chu J, et al. A comparison of patients' and physiotherapists' expectations about walking post spinal cord injury: a longitudinal cohort study. *Spinal Cord* 2012;50(7):548-52. doi: <http://dx.doi.org/10.1038/sc.2012.1>
25. Hammell KW. Experience of rehabilitation following spinal cord injury: a meta-synthesis of qualitative findings. *Spinal Cord* 2007;45:260-74.
26. LaVela SL, Landers K, Etingen B, et al. Factors related to caregiving for individuals with spinal cord injury compared to caregiving for individuals with other neurologic conditions. *J Spinal Cord Med* 2015;38(4):505-14. doi: <http://dx.doi.org/10.1179/2045772314Y.0000000240>
27. Smith EM, Boucher N, Miller WC. Caregiving services in spinal cord injury: a systematic review of the literature. *Spinal Cord* 2016:562-69. doi: 10.1038/sc.2016.8
28. Stiens SA, Fawber HL, Yuhas SA. The person with a spinal cord injury: an evolving prototype for life care planning. *Physical Medicine and Rehabilitation Clinics of North America* 2013;24(3):419-44. doi: 10.1016/j.pmr.2013.03.006

- 1  
2  
3  
4  
5  
6  
7  
8  
9  
10  
11  
12  
13  
14  
15  
16  
17  
18  
19  
20  
21  
22  
23  
24  
25  
26  
27  
28  
29  
30  
31  
32  
33  
34  
35  
36  
37  
38  
39  
40  
41  
42  
43  
44  
45  
46  
47  
48  
49  
50  
51  
52  
53  
54  
55  
56  
57  
58  
59  
60
29. Sweet SN, Noreau L, Leblond J, et al. Understanding quality of life in adults with spinal cord injury via SCI-related needs and secondary complications. *Top Spinal Cord Inj Rehabil* 2014;20(4):321-8. doi: 10.1310/sci2004-321
30. Beauregard L, Guindon A, Noreau L, et al. Community needs of people living with spinal cord injury and their family. *Top Spinal Cord Inj Rehabil* 2012;18(2):122-5. doi: 10.1310/sci1802-122
31. van Loo MA, Post MW, Bloemen JH, et al. Care needs of persons with long-term spinal cord injury living at home in the Netherlands. *Spinal Cord* 2010;48(5):423-8. doi: <http://dx.doi.org/10.1038/sc.2009.142>
32. Noreau L, Noonan VK, Cobb J, et al. Spinal cord injury community survey: a national, comprehensive study to portray the lives of Canadians with spinal cord injury. *Top Spinal Cord Inj Rehabil* 2014;20(4):249-64. doi: 10.1310/sci2004-249
33. Meade MA, Taylor LA, Kreutzer JS, et al. A preliminary study of acute family needs after spinal cord injury: analysis and implications. *Rehabil Psychol* 2004;49(2):150-55.
34. New PW. A multidisciplinary consultation team to address the unmet needs of hospitalized patients with spinal cord injury. *Arch Neurol* 2010;67(9):1074-6. doi: <http://dx.doi.org/10.1001/archneurol.2010.204>
35. Arksey H, O'Malley L. Scoping studies: towards a methodological framework. *International Journal of Social Research Methodology* 2005;8(1):19-32.
36. Maslow AH, Frager R, Fadiman J. Motivation and personality. 3th ed. New York: Harper & Row 1987.
37. Ferrans CE, Zerwic JJ, Wilbur JE, et al. Conceptual model of health-related quality of life. *J Nurs Scholarsh* 2005;37(4):336-42.

- 1  
2  
3  
4  
5  
6  
7  
8  
9  
10  
11  
12  
13  
14  
15  
16  
17  
18  
19  
20  
21  
22  
23  
24  
25  
26  
27  
28  
29  
30  
31  
32  
33  
34  
35  
36  
37  
38  
39  
40  
41  
42  
43  
44  
45  
46  
47  
48  
49  
50  
51  
52  
53  
54  
55  
56  
57  
58  
59  
60
38. Schubart JR, Hilgart M, Lyder C. Pressure ulcer prevention and management in spinal cord-injured adults: analysis of educational needs. *Adv Skin Wound Care* 2008;21(7):322-9. doi: <http://dx.doi.org/10.1097/01.ASW.0000323521.93058.47>
39. Kennedy P, Lude P, Taylor N. Quality of life, social participation, appraisals and coping post spinal cord injury: a review of four community samples. *Spinal Cord* 2006;44(2):95-105. doi: 10.1038/sj.sc.3101787
40. Taormina RJ, Gao JH. Maslow and the motivation hierarchy: measuring satisfaction of the needs. *Am J Psychol* 2013;126(2):155-77.
41. Minshull J, Ross K, Turner J. The human needs model of nursing. *J Adv Nurs* 1986;11(6):643-9.
42. Majercsik E. Hierarchy of needs of geriatric patients. *Gerontology* 2005;51(3):170-3. doi: 10.1159/000083989
43. Jackson JC, Santoro MJ, Ely TM, et al. Improving patient care through the prism of psychology: application of Maslow's hierarchy to sedation, delirium, and early mobility in the intensive care unit. *J Crit Care* 2014;29(3):438-44. doi: 10.1016/j.jcrc.2014.01.009
44. Zalenski RJ, Raspa R. Maslow's hierarchy of needs: a framework for achieving human potential in hospice. *J Palliat Med* 2006;9(5):1120-7. doi: 10.1089/jpm.2006.9.1120
45. Calabro L. "First things first": Maslow's hierarchy as a framework for rebt in promoting disability adjustment during rehabilitation. *Journal of Rational-Emotive & Cognitive-Behavior Therapy* 1997;15(3):193-213.
46. Scholzel-Dorenbos CJ, Meeuwse EJ, Olde Rikkert MG. Integrating unmet needs into dementia health-related quality of life research and care: introduction of the hierarchy model of needs in dementia. *Aging & mental health* 2010;14(1):113-9. doi: 10.1080/13607860903046495
47. Beran D. Developing a hierarchy of needs for Type 1 diabetes. *Diabet Med* 2014;31(1):61-7. doi: 10.1111/dme.12284



- 1  
2  
3  
4  
5  
6  
7  
8  
9  
10  
11  
12  
13  
14  
15  
16  
17  
18  
19  
20  
21  
22  
23  
24  
25  
26  
27  
28  
29  
30  
31  
32  
33  
34  
35  
36  
37  
38  
39  
40  
41  
42  
43  
44  
45  
46  
47  
48  
49  
50  
51  
52  
53  
54  
55  
56  
57  
58  
59  
60
48. Best D, Day E, McCarthy T, et al. The hierarchy of needs and care planning in addiction services: what Maslow can tell us about addressing competing priorities? *Addiction Research & Theory* 2008;16(4):305-07.
49. Henwood BF, Derejko KS, Couture J, et al. Maslow and mental health recovery: a comparative study of homeless programs for adults with serious mental illness. *Adm Policy Ment Health* 2015;42(2):220-8. doi: 10.1007/s10488-014-0542-8
50. Ishikura R, Tashiro N. Frustration and fulfillment of needs in dissociative and conversion disorders. *Psychiatry Clin Neurosci* 2002;56(4):381-90. doi: 10.1046/j.1440-1819.2002.01026.x
51. Bakas T, McLennon SM, Carpenter JS, et al. Systematic review of health-related quality of life models. *Health and quality of life outcomes* 2012;10:134. doi: 10.1186/1477-7525-10-134
52. Manns PJ, May LA. Perceptions of issues associated with the maintenance and improvement of long-term health in people with SCI. *Spinal Cord* 2007;45(6):411-9.
53. Conti A, Garrino L, Montanari P, et al. Informal caregivers' needs on discharge from the spinal cord unit: analysis of perceptions and lived experiences. *Disabil Rehabil* 2016;38(2):159-67. doi: 10.3109/09638288.2015.1031287
54. Farace DJ, Schöpfel J. Grey literature in library and information studies. Berlin ; New York: De Gruyter Saur 2010.
55. McGowan J, Sampson M, Salzwedel DM, et al. PRESS peer review of electronic search strategies: 2015 guideline statement. *J Clin Epidemiol* 2016 doi: 10.1016/j.jclinepi.2016.01.021
56. Higgins J, Green S, editors. *Cochrane handbook for systematic reviews of interventions Version 5.1.0 [updated March 2011]*: The Cochrane Collaboration, 2011.
57. Levac D, Colquhoun H, O'Brien KK. Scoping studies: advancing the methodology. *Implement Sci* 2010;5:69. doi: 10.1186/1748-5908-5-69

1  
2  
3  
4  
5  
6  
7  
8  
9  
10  
11  
12  
13  
14  
15  
16  
17  
18  
19  
20  
21  
22  
23  
24  
25  
26  
27  
28  
29  
30  
31  
32  
33  
34  
35  
36  
37  
38  
39  
40  
41  
42  
43  
44  
45  
46  
47  
48  
49  
50  
51  
52  
53  
54  
55  
56  
57  
58  
59  
60

**Figure legends**

Figure 1. Maslow’s hierarchy model of human needs

Figure 2. Integrative approach towards SCI needs

For peer review only

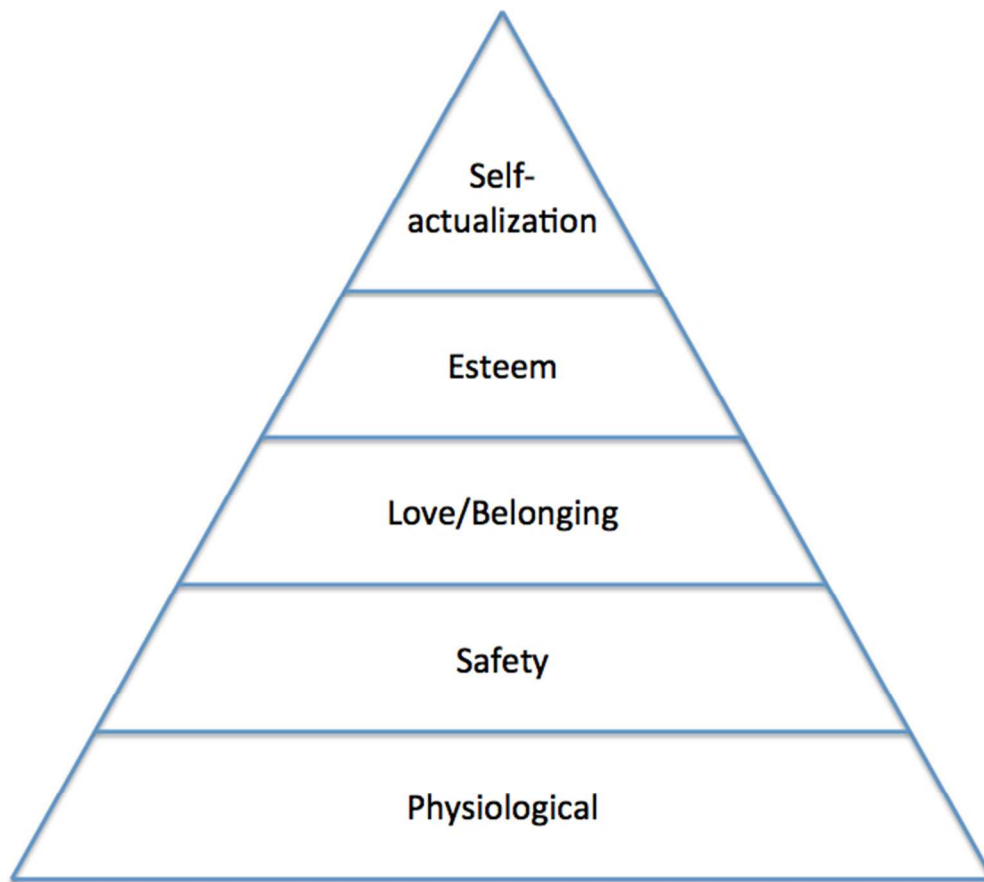

Figure 1. Maslow's hierarchy model of human needs

242x215mm (72 x 72 DPI)

only

1  
2  
3  
4  
5  
6  
7  
8  
9  
10  
11  
12  
13  
14  
15  
16  
17  
18  
19  
20  
21  
22  
23  
24  
25  
26  
27  
28  
29  
30  
31  
32  
33  
34  
35  
36  
37  
38  
39  
40  
41  
42  
43  
44  
45  
46  
47  
48  
49  
50  
51  
52  
53  
54  
55  
56  
57  
58  
59  
60

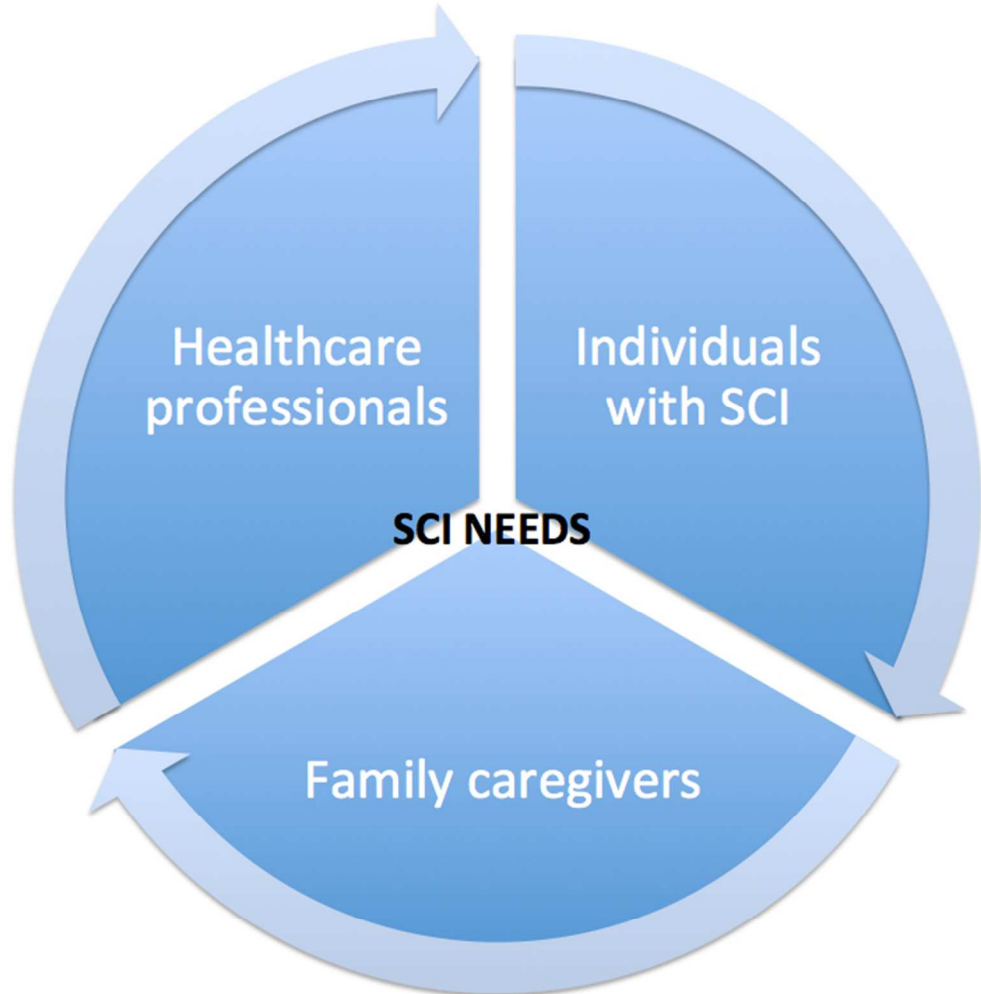

Figure 2. Integrative approach towards SCI needs

252x258mm (72 x 72 DPI)

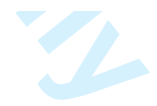

Manuscript ID bmjopen-2016-014331

**Integrating the perspectives of individuals with spinal cord injuries, their family caregivers, and healthcare professionals across the continuum of care: protocol for a scoping study on SCI needs**

PRISMA-P (Preferred Reporting Items for Systematic review and Meta-Analysis Protocols) 2015 checklist: recommended items to address in a systematic review protocol\*

| Reported on page                  | Section and topic         | Item No | Checklist item                                                                                                                                                                                       |
|-----------------------------------|---------------------------|---------|------------------------------------------------------------------------------------------------------------------------------------------------------------------------------------------------------|
| <b>ADMINISTRATIVE INFORMATION</b> |                           |         |                                                                                                                                                                                                      |
| 1                                 | Title                     |         | Integrating the perspectives of individuals with spinal cord injuries, their family caregivers, and healthcare professionals across the continuum of care: protocol for a scoping study on SCI needs |
| 1, 4, 13                          | Identification            | 1a      | Identify the report as a protocol of a systematic review                                                                                                                                             |
| -                                 | Update                    | 1b      | If the protocol is for an update of a previous systematic review, identify as such                                                                                                                   |
| -                                 | Registration              | 2       | If registered, provide the name of the registry (such as PROSPERO) and registration number                                                                                                           |
|                                   | Authors                   |         | Alexander Moreno, Diana Zidarov, Chandhana Raju, Jill Boruff & Sara Ahmed                                                                                                                            |
| 1, 2                              | Contact                   | 3a      | Provide name, institutional affiliation, e-mail address of all protocol authors; provide physical mailing address of corresponding author                                                            |
| 21                                | Contributions             | 3b      | Describe contributions of protocol authors and identify the guarantor of the review                                                                                                                  |
| -                                 | Amendments                | 4       | If the protocol represents an amendment of a previously completed or published protocol, identify as such and list changes; otherwise, state plan for documenting important protocol amendments      |
|                                   | Support:                  |         |                                                                                                                                                                                                      |
| 3, 21                             | Sources                   | 5a      | Indicate sources of financial or other support for the review                                                                                                                                        |
| 3, 21                             | Sponsor                   | 5b      | Provide name for the review funder and/or sponsor                                                                                                                                                    |
| 3, 21                             | Role of sponsor or funder | 5c      | Describe roles of funder(s), sponsor(s), and/or institution(s), if any, in developing the protocol                                                                                                   |
| <b>INTRODUCTION</b>               |                           |         |                                                                                                                                                                                                      |
| 6-10                              | Rationale                 | 6       | Describe the rationale for the review in the context of what is already known                                                                                                                        |
| 10, 13                            | Objectives                | 7       | Provide an explicit statement of the question(s) the review will address with reference to participants, interventions, comparators, and outcomes (PICO)                                             |
| <b>METHODS</b>                    |                           |         |                                                                                                                                                                                                      |
| 13, 14                            | Eligibility criteria      | 8       | Specify the study characteristics (such as PICO, study design, setting, time frame) and report characteristics (such as years considered, language, publication status) to be used as criteria for   |

|        |                                    |     |                                                                                                                                                                                                                                                  |
|--------|------------------------------------|-----|--------------------------------------------------------------------------------------------------------------------------------------------------------------------------------------------------------------------------------------------------|
|        |                                    |     | eligibility for the review                                                                                                                                                                                                                       |
| 14     | Information sources                | 9   | Describe all intended information sources (such as electronic databases, contact with study authors, trial registers or other grey literature sources) with planned dates of coverage                                                            |
| 14, 15 | Search strategy                    | 10  | Present draft of search strategy to be used for at least one electronic database, including planned limits, such that it could be repeated                                                                                                       |
|        | Study records:                     |     |                                                                                                                                                                                                                                                  |
| 15, 16 | Data management                    | 11a | Describe the mechanism(s) that will be used to manage records and data throughout the review                                                                                                                                                     |
| 16, 17 | Selection process                  | 11b | State the process that will be used for selecting studies (such as two independent reviewers) through each phase of the review (that is, screening, eligibility and inclusion in meta-analysis)                                                  |
| 16, 17 | Data collection process            | 11c | Describe planned method of extracting data from reports (such as piloting forms, done independently, in duplicate), any processes for obtaining and confirming data from investigators                                                           |
| 14, 15 | Data items                         | 12  | List and define all variables for which data will be sought (such as PICO items, funding sources), any pre-planned data assumptions and simplifications                                                                                          |
| 18-20  | Outcomes and prioritization        | 13  | List and define all outcomes for which data will be sought, including prioritization of main and additional outcomes, with rationale                                                                                                             |
| 18-20  | Risk of bias in individual studies | 14  | Describe anticipated methods for assessing risk of bias of individual studies, including whether this will be done at the outcome or study level, or both; state how this information will be used in data synthesis                             |
| 17     | Data synthesis                     | 15a | Describe criteria under which study data will be quantitatively synthesised                                                                                                                                                                      |
| 17     |                                    | 15b | If data are appropriate for quantitative synthesis, describe planned summary measures, methods of handling data and methods of combining data from studies, including any planned exploration of consistency (such as $I^2$ , Kendall's $\tau$ ) |
| 17     |                                    | 15c | Describe any proposed additional analyses (such as sensitivity or subgroup analyses, meta-regression)                                                                                                                                            |
| 17     |                                    | 15d | If quantitative synthesis is not appropriate, describe the type of summary planned                                                                                                                                                               |
| -      | Meta-bias(es)                      | 16  | Specify any planned assessment of meta-bias(es) (such as publication bias across studies, selective reporting within studies)                                                                                                                    |
| -      | Confidence in cumulative evidence  | 17  | Describe how the strength of the body of evidence will be assessed (such as GRADE)                                                                                                                                                               |

\* It is strongly recommended that this checklist be read in conjunction with the PRISMA-P Explanation and Elaboration (cite when available) for important clarification on the items. Amendments to a review protocol should be tracked and dated. The copyright for PRISMA-P (including checklist) is held by the PRISMA-P Group and is distributed under a Creative Commons Attribution Licence 4.0.

1  
2  
3  
4  
5 From: Shamseer L, Moher D, Clarke M, Ghersi D, Liberati A, Petticrew M, Shekelle P, Stewart L, PRISMA-P Group. Preferred reporting items for systematic review and  
6 meta-analysis protocols (PRISMA-P) 2015: elaboration and explanation. *BMJ*. 2015 Jan 2;349(jan02 1):g7647.  
7  
8  
9  
10  
11  
12  
13  
14  
15  
16  
17  
18  
19  
20  
21  
22  
23  
24  
25  
26  
27  
28  
29  
30  
31  
32  
33  
34  
35  
36  
37  
38  
39  
40  
41  
42  
43  
44  
45  
46  
47  
48  
49

For peer review only

# BMJ Open

**Integrating the perspectives of individuals with spinal cord injuries, their family caregivers, and healthcare professionals from the time of rehabilitation admission to community reintegration: protocol for a scoping study on SCI needs**

|                                 |                                                                                                                                                                                                                                                                                                                                                                                                                                      |
|---------------------------------|--------------------------------------------------------------------------------------------------------------------------------------------------------------------------------------------------------------------------------------------------------------------------------------------------------------------------------------------------------------------------------------------------------------------------------------|
| Journal:                        | <i>BMJ Open</i>                                                                                                                                                                                                                                                                                                                                                                                                                      |
| Manuscript ID                   | bmjopen-2016-014331.R2                                                                                                                                                                                                                                                                                                                                                                                                               |
| Article Type:                   | Protocol                                                                                                                                                                                                                                                                                                                                                                                                                             |
| Date Submitted by the Author:   | 15-May-2017                                                                                                                                                                                                                                                                                                                                                                                                                          |
| Complete List of Authors:       | Moreno, Jhon; McGill University Faculty of Medicine, School of Physical and Occupational Therapy<br>Zidarov, Diana; McGill University, School of Physical and Occupational Therapy<br>Raju, Chandhana; McGill University, School of Physical and Occupational Therapy<br>Boruff, Jill; McGill University, Schulich Library of Science and Engineering<br>Ahmed, Sara; McGill University, School of Physical and Occupational Therapy |
| <b>Primary Subject Heading</b>: | Neurology                                                                                                                                                                                                                                                                                                                                                                                                                            |
| Secondary Subject Heading:      | Neurology                                                                                                                                                                                                                                                                                                                                                                                                                            |
| Keywords:                       | Spinal cord injury, Needs, Caregiver, Healthcare, Scoping study                                                                                                                                                                                                                                                                                                                                                                      |
|                                 |                                                                                                                                                                                                                                                                                                                                                                                                                                      |

SCHOLARONE™  
Manuscripts



1  
2  
3  
4  
5  
6  
7  
8  
9  
10  
11  
12  
13  
14  
15  
16  
17  
18  
19  
20  
21  
22  
23  
24  
25  
26  
27  
28  
29  
30  
31  
32  
33  
34  
35  
36  
37  
38  
39  
40  
41  
42  
43  
44  
45  
46  
47  
48  
49  
50  
51  
52  
53  
54  
55  
56  
57  
58  
59  
60

# **Integrating the perspectives of individuals with spinal cord injuries, their family caregivers, and healthcare professionals from the time of rehabilitation admission to community reintegration: protocol for a scoping study on SCI needs**

Alexander Moreno<sup>1,2</sup>, Diana Zidarov<sup>1,2</sup>, Chandhana Raju<sup>1,2</sup>, Jill Boruff<sup>3</sup> & Sara Ahmed<sup>1,2</sup>

<sup>1</sup>Faculty of Medicine, School of Physical and Occupational Therapy, McGill University, CANADA

<sup>2</sup>Center for Interdisciplinary Research in Rehabilitation of Greater Montreal, CANADA

<sup>3</sup>Schulich Library of Science and Engineering, McGill University, CANADA

## **Address for correspondence:**

Sara Ahmed, Ph.D.

Center for Interdisciplinary Research in Rehabilitation (CRIR) – Constance-Lethbridge Rehabilitation

Centre, CIUSSS Centre-Ouest-de-l'Île-de-Montréal, 7005, Maisonneuve Blvd. West, Room 2-335

Email: [sara.ahmed@mcgill.ca](mailto:sara.ahmed@mcgill.ca)

**Institutional addresses and emails:**

Alexander Moreno, Ph.D.: Faculté des sciences humaines, Département de sexologie, Université du Québec à Montréal (UQÀM), C.P. 8888, Succ. Centre-Ville, Montréal, Québec, Canada, H3C-3P8. Center for Interdisciplinary Research in Rehabilitation (CRIR) – Constance-Lethbridge Rehabilitation Centre, CIUSSS Centre-Ouest-de-l'Île-de-Montréal, 7005, Maisonneuve Blvd. West, Room 2-335.

Email: [moreno.jhon\\_alexander@uqam.ca](mailto:moreno.jhon_alexander@uqam.ca) ; [jhon.moreno@mail.mcgill.ca](mailto:jhon.moreno@mail.mcgill.ca)

Diana Zidarov, pht, Ph.D. Faculty of Medicine, School of Physical and Occupational Therapy, McGill University, 3654 Prom. Sir William Osler, Montreal, Quebec, Canada; Center for Interdisciplinary Research in Rehabilitation (CRIR) – Constance-Lethbridge Rehabilitation Centre, CIUSSS Centre-Ouest-de-l'Île-de-Montréal, 7005, Maisonneuve blvd West, Room 2-335 Email: [diana.zidarov@mail.mcgill.ca](mailto:diana.zidarov@mail.mcgill.ca)

Chandhana Raju, B.S.: Constance-Lethbridge Rehabilitation Centre, CIUSSS Centre-Ouest-de-l'Île-de-Montréal, 7005, Maisonneuve Blvd. West, Room 2-335. Email: [chandhana.raju@mail.mcgill.ca](mailto:chandhana.raju@mail.mcgill.ca)

Jill Boruff, M.L.I.S.: Schulich Library of Science and Engineering, Macdonald-Stewart Library Building 809 Sherbrooke Street West, Montreal, Quebec H3A 0C1. Email: [jill.boruff@mcgill.ca](mailto:jill.boruff@mcgill.ca)

Sara Ahmed, Ph.D.: Center for Interdisciplinary Research in Rehabilitation (CRIR) – Constance-Lethbridge Rehabilitation Centre, CIUSSS Centre-Ouest-de-l'Île-de-Montréal, Institut de réadaptation Gingras-Lindsay-de-Montréal du CIUSSS du Centre-Est-de-l'Ile-de-Montréal, 7005, Maisonneuve blvd West, Room 2-335; Faculty of Medicine, School of Physical & Occupational Therapy, McGill

1  
2 University. 3654 Prom Sir-William-Osler, Montreal, QC, Canada, H3G 1Y5; McGill University Health  
3  
4 Center, Clinical Epidemiology, 687 Pine Ave W, Montreal, QC, Canada, H3A 1A1  
5  
6  
7

8  
9 Email: [sara.ahmed@mcgill.ca](mailto:sara.ahmed@mcgill.ca)  
10  
11

12  
13 Acknowledgements: This work was supported by a research grant awarded to Sara Ahmed from the  
14 Lindsay Rehabilitation Hospital Foundation (INSPIRE). Sara Ahmed is supported by a senior research  
15 scientist career award from the *Fonds de la recherche du Québec-Santé* (FRQS). Alexander Moreno is  
16 supported by a postdoctoral fellowship of the Networks of Centres of Excellence of Canada (AGE-  
17 WELL NCE) and from the Lindsay Rehabilitation Hospital Foundation. Diana Zidarov is supported by  
18 a Richard and Edith Strauss Post-Doctoral Fellowship from McGill University.  
19  
20  
21  
22  
23  
24  
25  
26  
27  
28  
29  
30  
31

32 **Word count: 4556**  
33  
34  
35  
36  
37  
38  
39  
40  
41  
42  
43  
44  
45  
46  
47  
48  
49  
50  
51  
52  
53  
54  
55  
56  
57  
58  
59  
60

## Abstract

**Introduction:** There is fragmented information about the different needs following a spinal cord injury (SCI). Expressed SCI needs can be met or unmet, they change along the rehabilitation continuum (e.g., acute, rehabilitation, and reintegration into the community), and can be different for traumatic and non-traumatic SCI. The general objective of this scoping study is to evaluate and integrate the needs of individuals with traumatic and non-traumatic SCI, their family caregivers, and those reported by rehabilitation professionals from the time of rehabilitation admission to community reintegration. The specific objectives are to: a) synthesize the needs of individuals with SCI as perceived by themselves, their family caregivers, and rehabilitation professionals using two theoretical models, b) classify needs as met and unmet, c) explore the evolution of met/unmet needs from the time of rehabilitation admission to community reintegration, and d) provide recommendations to improve SCI care.

**Methods and analysis:** a) identifying the most frequent met and unmet needs reported by adults with traumatic and non-traumatic SCI, their family caregivers, and their rehabilitation professionals from the time of rehabilitation admission to community reintegration; b) identifying relevant studies with a search in electronic databases; c) charting the data based on categories refined and adjusted with a stakeholder group; d) collating, summarizing, and reporting the results two analytical frameworks (Maslow's hierarchical model of human needs and the Ferrans et al.'s model of Health-Related Quality of Life), and e) a stakeholder consultation phase.

**Ethics and dissemination:** The results of this scoping study will allow understanding SCI needs from the time of rehabilitation admission to community reintegration from the perspective of different stakeholders. An integrated master report combining the needs of individuals with SCI from the

1  
2 perspectives of different stakeholders from the time of rehabilitation admission to community  
3  
4 reintegration will follow the consultation meetings.  
5  
6  
7

8  
9 **Keywords:** Spinal Cord Injury, needs, caregiver, healthcare, scoping study.  
10  
11

## 12 13 14 **Strengths and limitations of this study**

### 15 16 Strengths

- 17  
18 • Description of SCI met and unmet needs in different moments of the rehabilitation  
19 process.  
20  
21
- 22  
23 • Comprehensive definition of needs in the context of SCI.  
24  
25
- 26  
27 • Multiperspective approach including family caregivers, healthcare professionals, and  
28 individuals with SCI.  
29  
30
- 31  
32 • Synthesis of SCI needs using two theoretical frameworks to capture both personal and  
33 environmental variables.  
34  
35
- 36  
37 • Knowledge translation plan to inform stakeholders about the conclusions.  
38

### 39 40 Limitations

- 41  
42 • Scoping studies do not appraise the quality of the evidence.  
43  
44
- 45  
46 • Generalization is limited to the SCI population.  
47  
48
- 49  
50 • Studies in languages other than English are excluded.  
51  
52  
53  
54  
55  
56  
57  
58  
59  
60

## Introduction

Spinal Cord Injury (SCI) corresponds to a neurological condition affecting 330 to 400 per 100,000 Canadians living in the community<sup>1</sup>. According to provincial data, traumatic SCI affects mainly young and middle-aged adults, with men showing the highest prevalence regardless of age group (men-to-women ratio of 4.4:1)<sup>2</sup>. Traumatic SCI is concentrated in younger populations, while non traumatic SCI is condensed in older age groups<sup>3</sup>. In addition, Canadian estimates indicate that compared to non traumatic SCI (49%), the prevalence is higher for traumatic SCI (51%)<sup>3</sup>. Furthermore, SCI is a high-cost chronic disability<sup>4</sup> involving changes in roles, self-image, body function, social interactions, and family relationships<sup>5</sup>.

For individuals with SCI, the injury permanently transforms their lives. Indeed, SCI can result in diverse motor, sensory, and autonomic problems<sup>6</sup>. Mobility impairment (e.g., paraplegia, tetraplegia), bowel and bladder incontinence, loss of sensation, and sexual dysfunction are common following SCI<sup>7</sup>. As a result, individuals with SCI have complex health needs as their condition includes chronic multimorbidity, mainly associated with the development of several secondary health conditions (e.g., pain and pressure ulcers)<sup>7</sup>. In addition, compared to community estimates, higher rates of psychological disorders can be present in 17 to 25% of individuals with SCI<sup>8</sup>. Particularly, between 18-37% of individuals with SCI experience depression<sup>9 10</sup>.

Also, studies regarding long-term outcomes indicate that individuals with SCI have low employment rates 20 years post-injury<sup>11</sup>. A review shows that employment rates following SCI range from 11 to 69% depending on the definition of employment and differences in the study methodology<sup>12</sup>. Thus, SCI has an important functional, psychological, and social impact on individuals that requires an integrated care approach across the continuum from acute care to community living. For instance,

1  
2 Craven et al. (2012) stressed the need for lifetime access to rehabilitation healthcare for individuals  
3  
4 with SCI<sup>13</sup>. Individuals with SCI require follow-up to address their evolving health needs, including  
5  
6 the challenges that represent aging with a disability and the development of SCI-related secondary  
7  
8 health conditions.  
9

10  
11  
12  
13  
14 For families, the unforeseen nature of the injury leads some of the members into an “unexpected career”  
15  
16 as family caregivers<sup>14</sup>. As family caregivers normally do not have training for the caregiving tasks  
17  
18 (e.g., bathing, dressing, feeding), they can experience role transitions<sup>15</sup>, strain<sup>16</sup>, isolation<sup>7</sup>, burden<sup>17</sup>,  
19  
20 poor leisure satisfaction<sup>18</sup>, reduced ability to become and remain employed<sup>19</sup>, and marital disruption<sup>20</sup>.  
21  
22  
23

### 24 25 Different perspectives in SCI needs

26  
27  
28 Individuals with SCI and their families, as well as healthcare professionals must work together to  
29  
30 effectively meet the diverse post-SCI needs<sup>21</sup>. For rehabilitation professionals, understanding the  
31  
32 interplay of different factors influencing support mechanisms to assist the transition to home and  
33  
34 community after discharge can facilitate social reintegration of the individual with SCI<sup>22</sup>. In fact,  
35  
36 rehabilitation professionals have an understanding of the needs and barriers that individuals with SCI  
37  
38 can encounter. Their observations are valuable as experts due to their professional roles with good  
39  
40 knowledge about the problems that individuals with SCI face<sup>23</sup>. Also, they can directly contribute to  
41  
42 the understanding of the rehabilitation process and the pre- and post-discharge challenges during  
43  
44 service delivery. For instance, shorter lengths of stay during inpatient rehabilitation can diminish the  
45  
46 opportunities to provide information and efficiently train dyads of individuals with SCI and their family  
47  
48 caregivers when they return to the community<sup>22</sup>. Thus, the healthcare professional’s perspective is  
49  
50 necessary when depicting a thorough picture of the barriers to meet the needs of individuals with SCI.  
51  
52 For instance, a study showed that compared to physiotherapists, some individuals with SCI have  
53  
54 unrealistically high expectations about walking one year post-injury<sup>24</sup>. Another study showed that  
55  
56  
57  
58  
59  
60

1  
2 when the perspectives of individuals with SCI are acknowledged during rehabilitation, they become  
3  
4 more committed to therapy, they express more confidence in their treating clinicians, and have better  
5  
6 satisfaction and outcomes <sup>25</sup>.  
7  
8

9  
10  
11 Compared to family caregivers of different neurological conditions, family caregivers of individuals  
12  
13 with SCI have experienced more frequent physical distress and present increased odds of coronary  
14  
15 heart disease and obesity <sup>26</sup>. Thus, their experience as family caregivers is crucial to understand the  
16  
17 needs of individuals with SCI, as they progressively become experts by experience while providing  
18  
19 care, supporting and addressing the needs of the care recipient with SCI. Family caregivers are an  
20  
21 important resource in the treatment of individuals with SCI considering that the quality of the care they  
22  
23 provide matches or exceeds the quality of professional care <sup>27</sup>. But unmet caregiver needs may prevent  
24  
25 optimal care and negatively affect the health of both the care recipients and their own. From a clinical  
26  
27 perspective, understanding the needs of individuals with SCI, knowing the person, and working with  
28  
29 the family can be beneficial to guide their healthcare and improve outcomes <sup>28</sup>. As unmet needs have a  
30  
31 direct relationship with diminished quality of life <sup>29</sup>, it is mandatory to understand them and to find  
32  
33 ways to meet them. In consequence, obtaining a comprehensive picture of needs by integrating the  
34  
35 different perspectives of professionals, family caregivers, and individuals with SCI is paramount.  
36  
37  
38  
39  
40  
41  
42  
43  
44

#### 45 Changing needs in the rehabilitation continuum

46  
47 The challenge is in understanding the evolution of these needs as they change over time. The literature  
48  
49 on SCI needs indicates that in the first year post-discharge, the fulfillment of critical needs (e.g.,  
50  
51 housing, transportation) is below 60% <sup>30</sup>, while the long-term care needed is higher than the care  
52  
53 received for information and psychosocial care needs <sup>31</sup>. Further, there are differences in needs between  
54  
55 individuals with traumatic and non-traumatic SCI. Compared to individuals with non traumatic SCI  
56  
57 (>70%), individuals with traumatic SCI (>85%) report more expressed needs on equipment and  
58  
59  
60



1  
2 technical aids, short-distance transportation, accessible housing, general healthcare, and SCI-  
3 specialized healthcare<sup>29</sup>. In addition, individuals with non traumatic SCI report more unmet needs in  
4 accessible housing, job training, and peer support<sup>32</sup>. Finally, fully addressing the needs of individuals'  
5 with SCI must include evaluating and targeting the needs of family caregivers. Family caregivers of  
6 individuals with SCI report health information needs as the most important and emotional support  
7 needs as those most often unmet<sup>33</sup>. Among the health and social consequences of unmet needs,  
8 individuals with SCI can present higher rates of multimorbidity<sup>7 34</sup>, dissatisfaction with their lives, high  
9 rates of psychological problems<sup>9</sup>, poor quality of life<sup>29</sup> and poor long-term integration into the  
10 community<sup>30</sup>. Also, unmet needs lead their family caregivers to invest more hours in their care<sup>27</sup>.

#### 25 Gaps in understanding met and unmet needs

26  
27  
28 Previous studies have evaluated SCI needs separately at different points of the rehabilitation continuum  
29 (e.g., inpatient, outpatient, and community) and with different types of SCI (e.g., traumatic versus non  
30 traumatic SCI, complete versus incomplete), from the perspective of individuals with SCI, family  
31 caregivers, and healthcare professionals. Further, studies have mainly considered SCI needs from a  
32 health services perspective rather than from a patient-centered perspective that accounts for areas that  
33 influence needs outside of the health system. To our knowledge there are no previous studies that have  
34 evaluated the variations in factors and synthesising these needs together from a patient-centered  
35 perspective. With fragmented information, it remains difficult for patients, family caregivers, health  
36 professionals, and researchers to understand the current gaps in SCI care and the most efficient ways to  
37 deliver care that are most likely to address unmet needs.

38  
39  
40 The objective of this study is to review the literature on SCI needs using a scoping study approach  
41 given the diffuse literature on SCI needs. Scoping studies allow for an appraisal of the literature and  
42 have four objectives<sup>35</sup>: a) to examine the extent, range, and nature of the research activity, b) to  
43  
44  
45  
46  
47  
48  
49  
50  
51  
52  
53  
54  
55  
56  
57  
58  
59  
60

1  
2 determine the value of conducting a systematic review, c) to summarize and disseminate research  
3 findings, and d) to identify gaps in the literature. This methodological strategy was chosen because  
4 compared to systematic reviews, scoping studies address broader topics and questions where different  
5 study designs are used, they intend to rapidly map the key concepts of a research area, and they  
6 encompass a comprehensive coverage of the literature (breadth more than in-depth). This scoping study  
7 will provide broad understanding and synthesis of SCI needs as reported by different stakeholders, for  
8 traumatic and non-traumatic SCI, from the time of rehabilitation admission to community reintegration.  
9 This scoping study will help us to identify unexplored areas of SCI needs and to provide  
10 recommendations to improve the quality of health services, to inform the development of new  
11 interventions to address unmet needs.  
12  
13  
14  
15  
16  
17  
18  
19  
20  
21  
22  
23  
24  
25  
26  
27

#### 28 Theoretical frameworks to guide the evaluation of unmet needs

29  
30 SCI needs will be synthesised based on two guiding theoretical frameworks: a) the conceptual  
31 framework of Maslow's *hierarchy model of needs* coming from humanistic psychology<sup>36</sup> and the  
32 Ferrans et al.'s model of Health-Related Quality of Life (HRQoL), which is a modified version of the  
33 Wilson and Cleary model of HRQoL<sup>37</sup>. Both the Maslow's model and the Ferrans et al.'s model are  
34 informative and appropriate to frame SCI needs taking into account the perspectives of different  
35 stakeholders.  
36  
37  
38  
39  
40  
41  
42  
43  
44  
45  
46

47 The definition of needs has been variable across published studies. Some of them define needs as the  
48 discrepancies between what is desired or optimal based on a guideline, and what is actually occurring<sup>38</sup>,  
49 a circumstance requiring a course of action<sup>39</sup>, or services that are necessary to support individual's  
50 community living<sup>29</sup>. For the current scoping study, a broader definition of needs corresponds to a lack  
51 of something that is essential to a person's existence or well-being, according to Maslow's hierarchical  
52 model<sup>40</sup>. In his groundbreaking theory of motivation, Maslow describes human needs as being  
53  
54  
55  
56  
57  
58  
59  
60

1  
2 hierarchical. Figure 1 depicts the pyramidal representation of human needs. As described in his theory,  
3  
4 human needs can be classified in five levels: a) physiological needs, b) safety and security needs, c)  
5  
6 belonging and love needs, d) esteem needs, and e) self-actualization needs. In healthcare, the  
7  
8 hierarchical model of needs has been applied to nursing <sup>41</sup>, geriatric care <sup>42</sup>, intensive care <sup>43</sup>, palliative  
9  
10 care <sup>44</sup>, disability and rehabilitation <sup>45</sup>, as well as to specific conditions such as dementia <sup>46</sup>, type 1  
11  
12 diabetes <sup>47</sup>, addiction <sup>48</sup>, homeless adults with serious mental illness <sup>49</sup>, and dissociative and conversion  
13  
14 disorders <sup>50</sup>. Although some of these needs cannot be provided by the health system, the use of this  
15  
16 framework has been useful to prioritize, conceptualize and understand needs, to develop a more  
17  
18 humanistic approach to successful healthcare, to support person-centered care planning, and to redefine,  
19  
20 change and improve the culture of care.  
21  
22  
23  
24  
25  
26  
27

28 Given that a SCI impacts all domains of the person's life (physical, social, psychological), needs are  
29  
30 not only related to the characteristics of the individual but also the environment the person lives in.  
31  
32 Therefore the Ferrans et al's model of HRQoL complements Maslow's model as it provides a guide for  
33  
34 understanding characteristics of the individual (that are mainly encompassed in the hierarchy model of  
35  
36 needs), but also the environmental component (e.g., physical and social environment), as well as  
37  
38 health-related domains that influence general health perceptions and quality of life (e.g., symptoms,  
39  
40 function, and participation) that need to be addressed when making evidence-based recommendations  
41  
42 regarding unmet SCI needs <sup>51</sup>. Thus, both theoretical models will provide an understanding of the  
43  
44 dynamics between the motivational aspects associated with SCI-needs (Maslow) and the environmental  
45  
46 influences on the HRQoL of individuals with SCI (Ferrans et al.), given that unmet needs have a direct  
47  
48 relationship with diminished quality of life <sup>29</sup>.  
49  
50  
51  
52  
53  
54  
55

56 Figure 1. Maslow's hierarchy model of human needs  
57  
58  
59  
60

---

Insert Figure 1 here

---

1  
2  
3  
4  
5  
6  
7  
8  
9  
10  
11  
12  
13  
14  
15  
16  
17  
18  
19  
20  
21  
22  
23  
24  
25  
26  
27  
28  
29  
30  
31  
32  
33  
34  
35  
36  
37  
38  
39  
40  
41  
42  
43  
44  
45  
46  
47  
48  
49  
50  
51  
52  
53  
54  
55  
56  
57  
58  
59  
60

In summary, as studies about SCI needs are conducted in different points of the rehabilitation continuum (e.g., inpatient, outpatient, and community) and with different types of injuries (e.g., traumatic versus non traumatic SCI, complete versus incomplete), a scoping study approach integrating the different perspectives of healthcare professionals, family caregivers, and individuals with SCI, guided by the Maslow and the Ferrans et al's models can help to depict a comprehensive picture of their needs. SCI needs are ongoing and they change in the rehabilitation continuum over the years<sup>52</sup>. In the very stressful period of the acute phase, SCI needs are not the same because both the families and individuals with SCI need time to adjust to their new reality following the injury, whereas outside the rehabilitation center SCI needs change depending on the path that individuals follow<sup>53</sup>. This scoping study will help to identify research gaps regarding SCI needs from the time of rehabilitation admission to community reintegration and to holistically understand the met and unmet needs to improve healthcare with an integrative approach including different perspectives (see figure 2).

Figure 2. Integrative approach towards SCI needs

---

Insert Figure 2 here

---

## Methods

The current scoping study will use the methodology described by Arksey and O'Malley (2005)<sup>35</sup>.

### *Step 1. Identifying the research question*

1  
2 The research question guiding the current scoping study is “Which are the most frequent met and  
3  
4 unmet needs (e.g., information needs, home support needs, personal care needs, respite needs,  
5  
6 psychological support needs, educational needs, employment needs, sexuality needs, technological  
7  
8 needs, telerehabilitation needs, spiritual needs, among others) reported by adults with traumatic and  
9  
10 non traumatic SCI, their family caregivers, and their rehabilitation professionals from the time of  
11  
12 rehabilitation admission to community reintegration?”  
13  
14

15  
16  
17  
18 Specifically, the current scoping study has four objectives:  
19

- 20  
21  
22  
23 1. To synthesize the needs of individuals with SCI as perceived by themselves, their family  
24  
25 caregivers, and their rehabilitation professionals according to the categories of the hierarchy of  
26  
27 human needs and the Ferrans et al.’s model of HRQoL.  
28  
29
- 30  
31 2. To classify needs as met and unmet.  
32
- 33  
34 3. To explore the evolution of met/unmet needs from the time of rehabilitation admission to  
35  
36 community reintegration.  
37
- 38  
39 4. To provide recommendations to improve SCI care.  
40  
41

#### 42 *Step 2. Identifying eligible studies*

43  
44 We will search published articles with the following inclusion criteria: a) publications from all health  
45  
46 professions, b) describing different needs in both traumatic and non traumatic SCI, c) participants with  
47  
48 18 years of age and older, d) from acute to chronic injuries, e) the timeframe of publication will be  
49  
50 limited to the last 20 years (1997 to 2017), f) qualitative, quantitative studies, and case reports, g)  
51  
52 available in English language, and h) grey literature defined as any documentary material that is non  
53  
54 commercially published such as technical reports, thesis’ repositories, materials produced by  
55  
56 associations and the industry, government documents, and working papers<sup>54</sup>. We will exclude: a)  
57  
58  
59  
60

conference abstracts, b) articles published in other languages, and c) studies addressing paediatric populations.

### *Search strategy and information sources*

A health science librarian (JB) developed the search strategy for Ovid Medline (Table 1) and had it peer reviewed by another librarian per the PRESS standard<sup>55</sup>. As health system issues often change with models of care delivery, the economic climate, and the environment, we have decided to narrow the scope to the past 20 years (1997 to present). This search strategy will be adapted for subsequent databases. The following databases will be searched with no date or language limits applied: Ovid Medline®, CINAHL, EMBASE, PsycINFO, Cochrane Library, Web of Science, ProQuest Dissertations and Theses. We will do hand searches of the reference lists of the selected articles to ensure that we have not missed any relevant information.

Grey literature will be searched on SCI websites, scientific and professional associations, and also using search engines on the Internet (e.g., Google and Yahoo). When using search engines, we will retain the first 50 results for the analysis given the amount of information available.

Table 1. Search strategy for Ovid MEDLINE(R) In-Process & Other Non-Indexed Citations, Ovid MEDLINE(R) Daily and Ovid MEDLINE(R) 1997 to present

|   |                           |
|---|---------------------------|
| 1 | exp Spinal Cord Injuries/ |
| 2 | spinal cord injur*.tw,kf. |
| 3 | exp Paraplegia/           |
| 4 | Quadriplegia/             |
| 5 | tetraplegia.tw,kf.        |
| 6 | paraplegia.tw,kf.         |
| 7 | Quadriplegia.tw,kf.       |

|    |                                                                                                                                                                                                                                                                                                                                                                                                                                                                                                                                                   |
|----|---------------------------------------------------------------------------------------------------------------------------------------------------------------------------------------------------------------------------------------------------------------------------------------------------------------------------------------------------------------------------------------------------------------------------------------------------------------------------------------------------------------------------------------------------|
| 8  | spinal column injur*.tw,kf.                                                                                                                                                                                                                                                                                                                                                                                                                                                                                                                       |
| 9  | central cord injur*.tw,kf.                                                                                                                                                                                                                                                                                                                                                                                                                                                                                                                        |
| 10 | 1 or 2 or 3 or 4 or 5 or 6 or 7 or 8 or 9                                                                                                                                                                                                                                                                                                                                                                                                                                                                                                         |
| 11 | ((met or unmet or expressed) adj3 (need or needs)).tw,kf.                                                                                                                                                                                                                                                                                                                                                                                                                                                                                         |
| 12 | Needs Assessment/                                                                                                                                                                                                                                                                                                                                                                                                                                                                                                                                 |
| 13 | "Health Services Needs and Demand"/                                                                                                                                                                                                                                                                                                                                                                                                                                                                                                               |
| 14 | Patient Preference/                                                                                                                                                                                                                                                                                                                                                                                                                                                                                                                               |
| 15 | Patient Satisfaction/                                                                                                                                                                                                                                                                                                                                                                                                                                                                                                                             |
| 16 | (sexual* adj2 (concern* or satisfaction or need or needs)).tw,kf.                                                                                                                                                                                                                                                                                                                                                                                                                                                                                 |
| 17 | ((caregiver* or famil* or spouse* or person* or patient* or client* or individual* or user* or research) adj3 (priorities or expectation* or preference* or perspective*)).tw,kf.                                                                                                                                                                                                                                                                                                                                                                 |
| 18 | ((self-actualization or self-esteem or esteem or spiritual or belonging or love or physiological or security or caregiver* or famil* or spouse* or transportation or support or social or economic or health or life or telerehabilitation or rehabilitation or rehabilitative or information or economic or emotional or community or home or personal care or respite or psychological or instrumental or safety or health care or healthcare or educational or employment or leisure or housing or technological) adj3 (need or needs)).tw,kf. |
| 19 | 11 or 12 or 13 or 14 or 15 or 16 or 17 or 18                                                                                                                                                                                                                                                                                                                                                                                                                                                                                                      |
| 20 | self concept/ or self efficacy/                                                                                                                                                                                                                                                                                                                                                                                                                                                                                                                   |
| 21 | (satisfaction or needs).tw,kf.                                                                                                                                                                                                                                                                                                                                                                                                                                                                                                                    |
| 22 | 20 and 21                                                                                                                                                                                                                                                                                                                                                                                                                                                                                                                                         |
| 23 | 19 or 22                                                                                                                                                                                                                                                                                                                                                                                                                                                                                                                                          |
| 24 | 10 and 23                                                                                                                                                                                                                                                                                                                                                                                                                                                                                                                                         |
| 25 | limit 24 to yr="1997 -Current"                                                                                                                                                                                                                                                                                                                                                                                                                                                                                                                    |

### Step 3: Study selection

In the first step, a reference management software (EndNote X7) will be used to merge the results and remove the duplicates before screening the abstracts. Later, a data extraction form will be developed by the research team to screen the abstracts based on the eligibility criteria described in step 2. Two independent reviewers will conduct the selection of abstracts starting with a pilot phase involving the examination of the first 20 titles and abstracts to screen and decide the retention of the abstract based on the inclusion criteria. The results of the independent ratings will be recorded separately using the data extraction form. Inter-rater agreement will be assessed using the kappa statistic<sup>56</sup>. Inter-rater agreement below 75% will lead to a revision and clarification of the eligibility criteria. The process will

1  
2 be repeated until an agreement of 75% will be reached, which is evidence of excellent agreement. This  
3  
4 is important as it is recommended that discussions are being held regarding the challenges and  
5  
6 uncertainties related to study selection and to refine the search strategy as needed <sup>57</sup>. Finally, all eligible  
7  
8 studies and those classified as unclear (i.e., requiring further information to make a final decision  
9  
10 regarding their retention) will be independently reviewed as full-text articles. Inter-rater agreement will  
11  
12 be re-assessed using the kappa statistic <sup>56</sup> on a random sample of 10 publications. Disagreements at this  
13  
14 stage will be resolved by consensus. In case of persistent disagreement, a third reviewer will be  
15  
16 consulted to determine the final inclusion.  
17  
18  
19  
20

#### 21 22 23 *Step 4. Data extraction process*

24  
25 The data extracted in the previous step will include the information corresponding to author(s), year of  
26  
27 publication, country of origin and context (where the study was conducted), status of publication (e.g.,  
28  
29 published or grey literature), journal, aims/purpose, study population (individuals with SCI, family  
30  
31 caregivers, rehabilitation professionals) and sample size (if applicable), SCI type (traumatic and non  
32  
33 traumatic), level(s) of care (acute, primary care, community), time since SCI, methodology/methods  
34  
35 (study design, measures), key findings that relate to the scoping study question/s (in terms of met and  
36  
37 unmet specific categories of needs). When available, the time for community reintegration will be  
38  
39 included and reported in years. At this stage, two independent reviewers will extract the information  
40  
41 based on the first 10 publications. Also, during the charting of the information, the reviewers will meet  
42  
43 following the extraction of the first 10 studies to make sure that the data extraction follows consistently  
44  
45 the purpose of the study. A meeting to evaluate the consistency of the information extracted will allow  
46  
47 the reviewers to identify inconsistencies and make decisions regarding the best way to deal with  
48  
49 ambiguity.  
50  
51  
52  
53  
54  
55  
56  
57  
58  
59  
60



1  
2 An iterative process consisting of inter-reviewer discussions held at the beginning, in the middle and at  
3  
4 the end of the extraction will lead to a consensus regarding the best way to extract the data. When  
5  
6 disagreements persist, a third independent reviewer will be consulted.  
7  
8  
9

#### 10 11 *Step 5. Data synthesis* 12

13  
14 This phase involves collating, summarizing, and reporting the results. Compared to systematic reviews,  
15  
16 scoping studies present a narrative account of a potentially large body of material <sup>35</sup>. Thus, guided by  
17  
18 the previous theoretical frameworks, we intend to identify a descriptive numerical summary (e.g.,  
19  
20 characteristics of included studies, types of study design, characteristics of the study population,  
21  
22 geographical location) and emerging themes (deductive thematic analysis) <sup>57</sup>. Using as an analytical  
23  
24 framework the Maslow's hierarchical model of human needs, we will extract the main themes  
25  
26 corresponding to the five categories of human needs and classify them as described by professionals,  
27  
28 family caregivers, and individuals with SCI. Similarly, met and unmet SCI needs will be classified  
29  
30 based on the Ferrans et al.'s model of HRQoL as characteristics of the individual and characteristics of  
31  
32 the environment, and their relationship with other components (e.g., biological function, symptoms,  
33  
34 functional status, general health perceptions, and overall quality of life). We will create a matrix that  
35  
36 integrates the themes identified for the Maslow's and Ferrans et al.'s model that will allow us to  
37  
38 explore the relationship between personal and environmental factors (Ferrans et al.'s model) that  
39  
40 influence needs (Maslow model). The matrix will allow the identification and intergroup comparison of  
41  
42 the met/unmet needs for each one of the groups (e.g., adults with traumatic and non traumatic SCI,  
43  
44 their family caregivers, and their rehabilitation professionals). Following the thematic analysis, special  
45  
46 considerations regarding the implications for research, policy and practice will be presented. Thus, the  
47  
48 analysis will include both individual and environmental influences of quality of life because SCI needs  
49  
50 can be unmet at different points of the continuum of care as a consequence of subjective (e.g.,  
51  
52  
53  
54  
55  
56  
57  
58  
59  
60

1  
2 motivation, beliefs, and attitudes) and environmental barriers (e.g., administrative issues, financial  
3  
4 limitations, limitations of health policies, among others).  
5  
6  
7

8  
9 *Step 6: Stakeholder consultation*  
10

11 The objective of this stage is to start translating knowledge into practice by disseminating results  
12 among potential knowledge users. Given the extensive information that will be synthesised and the  
13 diverse perspectives involved, we will request input from stakeholders at each step, and for each  
14 document/process that is developed for data extraction and synthesis. Therefore, stakeholder  
15 consultations will be held at the beginning of the process (requesting feedback to refine the research  
16 question, further refine the Ferrans et al.'s model relative to Maslow's model to focus data extraction  
17 and synthesis), during the study (validate the data extraction, decide the best way to align the  
18 information with stakeholders' needs), two to three times during data synthesis, and when preliminary  
19 or final results are available (knowledge mobilisation). Having information about SCI met and unmet  
20 needs will help stakeholders to prioritize different needs, based on the conclusions of the scoping  
21 review. Thus, stakeholders will benefit from the results and will be able to focus their efforts based on  
22 informed decisions about the different SCI needs. The current scoping review will permit to write an  
23 integrated master report combining the needs of individuals with SCI from the perspectives of different  
24 stakeholders from the time of rehabilitation admission to community reintegration. However, our  
25 knowledge translation plan will include extracting end-user specific information from the master report  
26 for each targeted group (i.e., adults with traumatic and non traumatic SCI, their family caregivers, and  
27 their rehabilitation professionals). For the current scoping study, relevant stakeholders include support  
28 groups of individuals with SCI and their family caregivers, clinicians, and decision-makers. The  
29 meetings will be organized either in a face-to-face format or using videoconference to allow broader  
30 participation, giving equal representation to the different groups.  
31  
32  
33  
34  
35  
36  
37  
38  
39  
40  
41  
42  
43  
44  
45  
46  
47  
48  
49  
50  
51  
52  
53  
54  
55  
56  
57  
58  
59  
60

## Discussion

The current scoping study will answer the question about the most frequent met and unmet needs reported by adults with traumatic and non traumatic SCI, their family caregivers, and their rehabilitation professionals from the time of rehabilitation admission to community reintegration. The results of the current scoping study could have implications from different viewpoints: a) rehabilitation can be informed from the synthesis of SCI needs because clinicians can become more sensitive as they increase awareness about the complexity of SCI expressed and unmet needs from the time of rehabilitation admission to community reintegration, b) service provision could be modified from gaining understanding about the gap between unmet and expressed needs, c) the view of rehabilitation as a changing process with evolving needs in different phases of care can help clinicians to understand and modify their practice when considering SCI needs as dynamic in different stages of care, d) the conception of new studies can be informed based on our comprehensive picture of SCI needs as it will suggest priorities in the research agenda, e) the development of new interventions could benefit from our conclusions as they will provide information to help to make informed decisions to address the most important unmet needs as outcomes, and f) policy makers could benefit from these results as they will be able to implement modifications to existent programs to adjust to the complexities of the interactions among different stakeholders involved in the provision of services to increase SCI needs satisfaction.

Scoping studies have some methodological limitations that include the fact that the quality of the evidence is not appraised. Compared to systematic reviews where the quality appraisal and the relative weight of evidence in favour or against a specific intervention is very important, scoping studies are descriptive and narrative<sup>35</sup>. However, scoping studies provide valid specific research questions needing a systematic review through a careful process of scrutinizing evidence coming from different

1  
2 methodologies and study designs. Also, scoping studies are not a short summary of many articles and,  
3  
4 as such, they use frameworks or themes to articulate their findings<sup>57</sup>. For the current scoping study, the  
5  
6 theoretical frameworks guiding the analysis of the information have been carefully chosen and  
7  
8 weighted against other competing models. However, we are aware that the findings could be  
9  
10 interpreted using alternative analytical frameworks.  
11  
12

13  
14  
15  
16 A few limitations regarding the search strategy need to be acknowledged. The search strategy includes  
17  
18 the use of different keywords to address needs, SCI, and the three groups of stakeholders that we would  
19  
20 like to target (e.g., individuals with SCI, their family caregivers, and their rehabilitation professionals).  
21  
22 However, even when we have clearly widened the keywords, it is possible that alternative terms could  
23  
24 make that some of the peer-reviewed literature could not be captured. To overcome this limitation, we  
25  
26 have the support of an experienced librarian in health sciences; iterative discussions led to the  
27  
28 refinement of the search strategy to avoid missing important pieces of information that could be vital to  
29  
30 respond to the research question. At the same time, the search strategy has been keenly refined to avoid  
31  
32 having an unmanageable number of references. In addition, scoping studies involve practical issues  
33  
34 related to time, funding, and access to resources that must be considered when finding the balance  
35  
36 between feasibility, breadth, and comprehensiveness<sup>57</sup>.  
37  
38  
39  
40  
41  
42  
43  
44

45 Issues associated with the resource implications represent the fact that even if scoping studies provide a  
46  
47 rapid appraisal and mapping of a specific field, it is wrong to assume that they are a quick or cheap  
48  
49 option, with some cases reporting the full-time involvement of at least three staff members and the  
50  
51 librarian for six consecutive months, with the study protocol as the starting point<sup>35</sup>. Thus, these studies  
52  
53 involve costs regarding the staff involved, the informatics resources needed, and the time demanded in  
54  
55 the selection of the studies by staff with the scientific qualifications required to critically select the  
56  
57 information and optimally chart the data. For the current scoping study, the experience of our lab in this  
58  
59  
60

1  
2 kind of studies, as well as the scientific qualifications of our staff (e.g., healthcare professionals,  
3  
4 graduate students, postdoctoral fellows, and researchers), make it feasible considering the high levels of  
5  
6 analytic skills needed.  
7  
8

9  
10  
11 In conclusion, this study protocol presents the rationale and methodology for a scoping study on SCI  
12 needs. Through a rigorous and transparent method, engaging individuals with SCI, family caregivers,  
13  
14 and health professionals at each step, it will provide a framework to understand the most frequent met  
15  
16 and unmet needs as reported by adults with traumatic and non traumatic SCI, their family caregivers,  
17  
18 and their rehabilitation professionals from the time of rehabilitation admission to community  
19  
20 reintegration.  
21  
22  
23  
24

### 25 26 27 28 Ethics and dissemination 29

30 As a scoping study is an analysis of published materials, it does not require REB approval. However,  
31  
32 for the consultation phase, the plan will be submitted for ethics approval and participants' informed  
33  
34 consent will be required at this stage. The dissemination of the results of the scoping study will include  
35  
36 multiple steps. First, after the consultation meetings, an integrated master report will be available. The  
37  
38 report will combine the needs of individuals with SCI from the perspectives of different stakeholders  
39  
40 from the time of rehabilitation admission to community reintegration. Second, we will extract end-user  
41  
42 specific information from the master report to be used as a knowledge translation strategy. That is, for  
43  
44 each group of stakeholders targeted in the review, there will be specific recommendations to be  
45  
46 communicated. For the current scoping study, relevant stakeholders include support groups of  
47  
48 individuals with SCI and their family caregivers, clinicians, and decision-makers. The  
49  
50 recommendations will be transmitted through meetings. Formats for those meetings include either a  
51  
52 face-to-face or videoconferences to allow broader participation, giving equal representation to the  
53  
54 different groups.  
55  
56  
57  
58  
59  
60

1  
2  
3  
4  
5  
6  
7  
8  
9  
10  
11  
12  
13  
14  
15  
16  
17  
18  
19  
20  
21  
22  
23  
24  
25  
26  
27  
28  
29  
30  
31  
32  
33  
34  
35  
36  
37  
38  
39  
40  
41  
42  
43  
44  
45  
46  
47  
48  
49  
50  
51  
52  
53  
54  
55  
56  
57  
58  
59  
60

**a. Contributorship statement:** Alexander Moreno, Ph.D. (conception and design, preliminary literature review, drafting of the manuscript, integrations of the edits in the different versions, and manuscript submission), Diana Zidarov, Ph.D. (edits and feedback), Chandana Raju M.S. (edits and feedback), Jill Boruff, MLIS, AHIP (database search), Sara Ahmed, Ph.D. (conception and design, edits and feedback).

**b. Competing interests:** None

**c. Funding:** Lindsay foundation (INSPIRE). Fonds de la recherche du Québec-Santé (FRQS). Networks of Centres of Excellence of Canada (AGE-WELL NCE).

**d. Data sharing statement:** N/A

## References

1. Government of Canada, Public Health Agency of Canada. Mapping connections: an understanding of neurological conditions in Canada. 2014
2. Lenehan B, Street J, Kwon BK, et al. The epidemiology of traumatic spinal cord injury in British Columbia, Canada. *Spine (Phila Pa 1976)* 2012;37(4):321-9. doi: 10.1097/BRS.0b013e31822e5ff8
3. Noonan VK, Fingas M, Farry A, et al. Incidence and prevalence of spinal cord injury in Canada: a national perspective. *Neuroepidemiology* 2012;38(4):219-26. doi: 10.1159/000336014
4. Munce SE, Wodchis WP, Guilcher SJ, et al. Direct costs of adult traumatic spinal cord injury in Ontario. *Spinal Cord* 2013;51(1):64-9. doi: <http://dx.doi.org/10.1038/sc.2012.81>
5. Chen HY, Boore JR. Living with a relative who has a spinal cord injury: a grounded theory approach. *J Clin Nurs* 2009;18(2):174-82. doi: <http://dx.doi.org/10.1111/j.1365-2702.2008.02355.x>
6. Hou S, Rabchevsky AG. Autonomic consequences of spinal cord injury. *Compr Physiol* 2014;4(4):1419-53. doi: 10.1002/cphy.c130045
7. Guilcher SJ, Craven BC, Lemieux-Charles L, et al. Secondary health conditions and spinal cord injury: an uphill battle in the journey of care. *Disability & Rehabilitation* 2013;35(11):894-906. doi: <http://dx.doi.org/10.3109/09638288.2012.721048>
8. Craig A, Nicholson Perry K, Guest R, et al. Prospective study of the occurrence of psychological disorders and comorbidities after spinal cord injury. *Arch Phys Med Rehabil* 2015;96(8):1426-34. doi: <http://dx.doi.org/10.1016/j.apmr.2015.02.027>
9. Khazaeipour Z, Taheri-Otaghsara S-M, Naghdi M. Depression following spinal cord injury: its relationship to demographic and socioeconomic indicators. *Topics in Spinal Cord Injury Rehabilitation* 2015;21(2):149-55 7p. doi: 10.1310/sci2102-149
10. Williams R, Murray A. Prevalence of depression after spinal cord injury: a meta-analysis. *Arch Phys Med Rehabil* 2015;96(1):133-40. doi: 10.1016/j.apmr.2014.08.016

- 1  
2  
3  
4  
5  
6  
7  
8  
9  
10  
11  
12  
13  
14  
15  
16  
17  
18  
19  
20  
21  
22  
23  
24  
25  
26  
27  
28  
29  
30  
31  
32  
33  
34  
35  
36  
37  
38  
39  
40  
41  
42  
43  
44  
45  
46  
47  
48  
49  
50  
51  
52  
53  
54  
55  
56  
57  
58  
59  
60
11. Lidal IB, Hjeltnes N, Roislien J, et al. Employment of persons with spinal cord lesions injured more than 20 years ago. *Disability and Rehabilitation: An International, Multidisciplinary Journal* 2009;31(26):2174-84. doi: <http://dx.doi.org/10.3109/09638280902946952>
12. Lidal IB, Huynh TK, Biering-Sorensen F. Return to work following spinal cord injury: a review. *Disabil Rehabil* 2007;29(17):1341-75. doi: 10.1080/09638280701320839
13. Craven C, Verrier M, Balioussis C, et al. Rehabilitation environmental scan atlas: capturing capacity in Canadian SCI rehabilitation, 2012.
14. Dickson A, O'Brien G, Ward R, et al. The impact of assuming the primary caregiver role following traumatic spinal cord injury: An interpretative phenomenological analysis of the spouse's experience. *Psychol Health* 2010;25(9):1101-20. doi: <http://dx.doi.org/10.1080/08870440903038949>
15. Chiu S. Using triangulation methodology study on role strain and demands of family caregivers for spinal cord injury patients during discharge transition. *Nursing Research (10226265)* 1998;6(6):513-25 13p.
16. Middleton JW, Simpson GK, De Wolf A, et al. Psychological distress, quality of life, and burden in caregivers during community reintegration after spinal cord injury. *Arch Phys Med Rehabil* 2014;95(7):1312-9. doi: <http://dx.doi.org/10.1016/j.apmr.2014.03.017>
17. Nogueira PC, Rabeh SA, Caliri MH, et al. [Caregivers of individuals with spinal cord injury: caregiver burden]. *Rev Esc Enferm USP* 2013;47(3):607-14.
18. Raj JT, Manigandan C, Jacob KS. Leisure satisfaction and psychiatric morbidity among informal carers of people with spinal cord injury. *Spinal Cord* 2006;44(11):676-9.
19. Ellenbogen PS, Meade MA, Jackson M, et al. The impact of spinal cord injury on the employment of family caregivers. *Journal of Vocational Rehabilitation* 2006;25(1):35-44.



- 1  
2  
3  
4  
5  
6  
7  
8  
9  
10  
11  
12  
13  
14  
15  
16  
17  
18  
19  
20  
21  
22  
23  
24  
25  
26  
27  
28  
29  
30  
31  
32  
33  
34  
35  
36  
37  
38  
39  
40  
41  
42  
43  
44  
45  
46  
47  
48  
49  
50  
51  
52  
53  
54  
55  
56  
57  
58  
59  
60
20. Dickson A, O'Brien G, Ward R, et al. Adjustment and coping in spousal caregivers following a traumatic spinal cord injury: an interpretative phenomenological analysis. *J Health Psychol* 2012;17(2):247-57. doi: <http://dx.doi.org/10.1177/1359105311411115>
21. Glass CA, Krishnan KR, Bingley JD. Spinal injury rehabilitation: do staff and patients agree on what they are talking about? *Paraplegia* 1991;29(5):343-9.
22. Kroll T. Rehabilitative needs of individuals with spinal cord injury resulting from gun violence: the perspective of nursing and rehabilitation professionals. *Appl Nurs Res* 2008;21(1):45-9. doi: <http://dx.doi.org/10.1016/j.apnr.2006.06.001>
23. Trezzini B, Phillips B. Impact of legal regulations and administrative policies on persons with SCI: identifying potential research priorities through expert interviews. *Disability & Rehabilitation* 2014;36(22):1883-91. doi: <http://dx.doi.org/10.3109/09638288.2014.881564>
24. Harvey LA, Adams R, Chu J, et al. A comparison of patients' and physiotherapists' expectations about walking post spinal cord injury: a longitudinal cohort study. *Spinal Cord* 2012;50(7):548-52. doi: <http://dx.doi.org/10.1038/sc.2012.1>
25. Hammell KW. Experience of rehabilitation following spinal cord injury: a meta-synthesis of qualitative findings. *Spinal Cord* 2007;45:260-74.
26. LaVela SL, Landers K, Etingen B, et al. Factors related to caregiving for individuals with spinal cord injury compared to caregiving for individuals with other neurologic conditions. *J Spinal Cord Med* 2015;38(4):505-14. doi: <http://dx.doi.org/10.1179/2045772314Y.0000000240>
27. Smith EM, Boucher N, Miller WC. Caregiving services in spinal cord injury: a systematic review of the literature. *Spinal Cord* 2016:562-69. doi: 10.1038/sc.2016.8
28. Stiens SA, Fawber HL, Yuhas SA. The person with a spinal cord injury: an evolving prototype for life care planning. *Physical Medicine and Rehabilitation Clinics of North America* 2013;24(3):419-44. doi: 10.1016/j.pmr.2013.03.006

- 1  
2  
3  
4  
5  
6  
7  
8  
9  
10  
11  
12  
13  
14  
15  
16  
17  
18  
19  
20  
21  
22  
23  
24  
25  
26  
27  
28  
29  
30  
31  
32  
33  
34  
35  
36  
37  
38  
39  
40  
41  
42  
43  
44  
45  
46  
47  
48  
49  
50  
51  
52  
53  
54  
55  
56  
57  
58  
59  
60
29. Sweet SN, Noreau L, Leblond J, et al. Understanding quality of life in adults with spinal cord injury via SCI-related needs and secondary complications. *Top Spinal Cord Inj Rehabil* 2014;20(4):321-8. doi: 10.1310/sci2004-321
30. Beauregard L, Guindon A, Noreau L, et al. Community needs of people living with spinal cord injury and their family. *Top Spinal Cord Inj Rehabil* 2012;18(2):122-5. doi: 10.1310/sci1802-122
31. van Loo MA, Post MW, Bloemen JH, et al. Care needs of persons with long-term spinal cord injury living at home in the Netherlands. *Spinal Cord* 2010;48(5):423-8. doi: <http://dx.doi.org/10.1038/sc.2009.142>
32. Noreau L, Noonan VK, Cobb J, et al. Spinal cord injury community survey: a national, comprehensive study to portray the lives of Canadians with spinal cord injury. *Top Spinal Cord Inj Rehabil* 2014;20(4):249-64. doi: 10.1310/sci2004-249
33. Meade MA, Taylor LA, Kreutzer JS, et al. A preliminary study of acute family needs after spinal cord injury: analysis and implications. *Rehabil Psychol* 2004;49(2):150-55.
34. New PW. A multidisciplinary consultation team to address the unmet needs of hospitalized patients with spinal cord injury. *Arch Neurol* 2010;67(9):1074-6. doi: <http://dx.doi.org/10.1001/archneurol.2010.204>
35. Arksey H, O'Malley L. Scoping studies: towards a methodological framework. *International Journal of Social Research Methodology* 2005;8(1):19-32.
36. Maslow AH, Frager R, Fadiman J. Motivation and personality. 3th ed. New York: Harper & Row 1987.
37. Ferrans CE, Zerwic JJ, Wilbur JE, et al. Conceptual model of health-related quality of life. *J Nurs Scholarsh* 2005;37(4):336-42.

- 1  
2  
3  
4  
5  
6  
7  
8  
9  
10  
11  
12  
13  
14  
15  
16  
17  
18  
19  
20  
21  
22  
23  
24  
25  
26  
27  
28  
29  
30  
31  
32  
33  
34  
35  
36  
37  
38  
39  
40  
41  
42  
43  
44  
45  
46  
47  
48  
49  
50  
51  
52  
53  
54  
55  
56  
57  
58  
59  
60
38. Schubart JR, Hilgart M, Lyder C. Pressure ulcer prevention and management in spinal cord-injured adults: analysis of educational needs. *Adv Skin Wound Care* 2008;21(7):322-9. doi: <http://dx.doi.org/10.1097/01.ASW.0000323521.93058.47>
39. Kennedy P, Lude P, Taylor N. Quality of life, social participation, appraisals and coping post spinal cord injury: a review of four community samples. *Spinal Cord* 2006;44(2):95-105. doi: 10.1038/sj.sc.3101787
40. Taormina RJ, Gao JH. Maslow and the motivation hierarchy: measuring satisfaction of the needs. *Am J Psychol* 2013;126(2):155-77.
41. Minshull J, Ross K, Turner J. The human needs model of nursing. *J Adv Nurs* 1986;11(6):643-9.
42. Majercsik E. Hierarchy of needs of geriatric patients. *Gerontology* 2005;51(3):170-3. doi: 10.1159/000083989
43. Jackson JC, Santoro MJ, Ely TM, et al. Improving patient care through the prism of psychology: application of Maslow's hierarchy to sedation, delirium, and early mobility in the intensive care unit. *J Crit Care* 2014;29(3):438-44. doi: 10.1016/j.jcrc.2014.01.009
44. Zalenski RJ, Raspa R. Maslow's hierarchy of needs: a framework for achieving human potential in hospice. *J Palliat Med* 2006;9(5):1120-7. doi: 10.1089/jpm.2006.9.1120
45. Calabro L. "First things first": Maslow's hierarchy as a framework for rebt in promoting disability adjustment during rehabilitation. *Journal of Rational-Emotive & Cognitive-Behavior Therapy* 1997;15(3):193-213.
46. Scholzel-Dorenbos CJ, Meeuwse EJ, Olde Rikkert MG. Integrating unmet needs into dementia health-related quality of life research and care: introduction of the hierarchy model of needs in dementia. *Aging & mental health* 2010;14(1):113-9. doi: 10.1080/13607860903046495
47. Beran D. Developing a hierarchy of needs for Type 1 diabetes. *Diabet Med* 2014;31(1):61-7. doi: 10.1111/dme.12284

- 1  
2  
3  
4  
5  
6  
7  
8  
9  
10  
11  
12  
13  
14  
15  
16  
17  
18  
19  
20  
21  
22  
23  
24  
25  
26  
27  
28  
29  
30  
31  
32  
33  
34  
35  
36  
37  
38  
39  
40  
41  
42  
43  
44  
45  
46  
47  
48  
49  
50  
51  
52  
53  
54  
55  
56  
57  
58  
59  
60
48. Best D, Day E, McCarthy T, et al. The hierarchy of needs and care planning in addiction services: what Maslow can tell us about addressing competing priorities? *Addiction Research & Theory* 2008;16(4):305-07.
49. Henwood BF, Derejko KS, Couture J, et al. Maslow and mental health recovery: a comparative study of homeless programs for adults with serious mental illness. *Adm Policy Ment Health* 2015;42(2):220-8. doi: 10.1007/s10488-014-0542-8
50. Ishikura R, Tashiro N. Frustration and fulfillment of needs in dissociative and conversion disorders. *Psychiatry Clin Neurosci* 2002;56(4):381-90. doi: 10.1046/j.1440-1819.2002.01026.x
51. Bakas T, McLennon SM, Carpenter JS, et al. Systematic review of health-related quality of life models. *Health and quality of life outcomes* 2012;10:134. doi: 10.1186/1477-7525-10-134
52. Manns PJ, May LA. Perceptions of issues associated with the maintenance and improvement of long-term health in people with SCI. *Spinal Cord* 2007;45(6):411-9.
53. Conti A, Garrino L, Montanari P, et al. Informal caregivers' needs on discharge from the spinal cord unit: analysis of perceptions and lived experiences. *Disabil Rehabil* 2016;38(2):159-67. doi: 10.3109/09638288.2015.1031287
54. Farace DJ, Schöpfel J. Grey literature in library and information studies. Berlin ; New York: De Gruyter Saur 2010.
55. McGowan J, Sampson M, Salzwedel DM, et al. PRESS peer review of electronic search strategies: 2015 guideline statement. *J Clin Epidemiol* 2016 doi: 10.1016/j.jclinepi.2016.01.021
56. Higgins J, Green S, editors. *Cochrane handbook for systematic reviews of interventions Version 5.1.0 [updated March 2011]*: The Cochrane Collaboration, 2011.
57. Levac D, Colquhoun H, O'Brien KK. Scoping studies: advancing the methodology. *Implement Sci* 2010;5:69. doi: 10.1186/1748-5908-5-69

1  
2  
3  
4  
5  
6  
7  
8  
9  
10  
11  
12  
13  
14  
15  
16  
17  
18  
19  
20  
21  
22  
23  
24  
25  
26  
27  
28  
29  
30  
31  
32  
33  
34  
35  
36  
37  
38  
39  
40  
41  
42  
43  
44  
45  
46  
47  
48  
49  
50  
51  
52  
53  
54  
55  
56  
57  
58  
59  
60

**Figure legends**

Figure 1. Maslow’s hierarchy model of human needs

Figure 2. Integrative approach towards SCI needs

For peer review only



Figure 1. Maslow's hierarchy model of human needs

242x215mm (72 x 72 DPI)

only

1  
2  
3  
4  
5  
6  
7  
8  
9  
10  
11  
12  
13  
14  
15  
16  
17  
18  
19  
20  
21  
22  
23  
24  
25  
26  
27  
28  
29  
30  
31  
32  
33  
34  
35  
36  
37  
38  
39  
40  
41  
42  
43  
44  
45  
46  
47  
48  
49  
50  
51  
52  
53  
54  
55  
56  
57  
58  
59  
60



Figure 2. Integrative approach towards SCI needs

252x258mm (72 x 72 DPI)

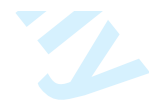

Manuscript ID bmjopen-2016-014331

**Integrating the perspectives of individuals with spinal cord injuries, their family caregivers, and healthcare professionals across the continuum of care: protocol for a scoping study on SCI needs**

PRISMA-P (Preferred Reporting Items for Systematic review and Meta-Analysis Protocols) 2015 checklist: recommended items to address in a systematic review protocol\*

| Reported on page | Section and topic                 | Item No | Checklist item                                                                                                                                                                                       |
|------------------|-----------------------------------|---------|------------------------------------------------------------------------------------------------------------------------------------------------------------------------------------------------------|
|                  | <b>ADMINISTRATIVE INFORMATION</b> |         |                                                                                                                                                                                                      |
| 1                | Title                             |         | Integrating the perspectives of individuals with spinal cord injuries, their family caregivers, and healthcare professionals across the continuum of care: protocol for a scoping study on SCI needs |
| 1, 4, 13         | Identification                    | 1a      | Identify the report as a protocol of a systematic review                                                                                                                                             |
| -                | Update                            | 1b      | If the protocol is for an update of a previous systematic review, identify as such                                                                                                                   |
| -                | Registration                      | 2       | If registered, provide the name of the registry (such as PROSPERO) and registration number                                                                                                           |
|                  | Authors                           |         | Alexander Moreno, Diana Zidarov, Chandhana Raju, Jill Boruff & Sara Ahmed                                                                                                                            |
| 1, 2             | Contact                           | 3a      | Provide name, institutional affiliation, e-mail address of all protocol authors; provide physical mailing address of corresponding author                                                            |
| 21               | Contributions                     | 3b      | Describe contributions of protocol authors and identify the guarantor of the review                                                                                                                  |
| -                | Amendments                        | 4       | If the protocol represents an amendment of a previously completed or published protocol, identify as such and list changes; otherwise, state plan for documenting important protocol amendments      |
|                  | Support:                          |         |                                                                                                                                                                                                      |
| 3, 21            | Sources                           | 5a      | Indicate sources of financial or other support for the review                                                                                                                                        |
| 3, 21            | Sponsor                           | 5b      | Provide name for the review funder and/or sponsor                                                                                                                                                    |
| 3, 21            | Role of sponsor or funder         | 5c      | Describe roles of funder(s), sponsor(s), and/or institution(s), if any, in developing the protocol                                                                                                   |
|                  | <b>INTRODUCTION</b>               |         |                                                                                                                                                                                                      |
| 6-10             | Rationale                         | 6       | Describe the rationale for the review in the context of what is already known                                                                                                                        |
| 10, 13           | Objectives                        | 7       | Provide an explicit statement of the question(s) the review will address with reference to participants, interventions, comparators, and outcomes (PICO)                                             |
|                  | <b>METHODS</b>                    |         |                                                                                                                                                                                                      |
| 13, 14           | Eligibility criteria              | 8       | Specify the study characteristics (such as PICO, study design, setting, time frame) and report characteristics (such as years considered, language, publication status) to be used as criteria for   |



|        |                                    |     |                                                                                                                                                                                                                                                  |
|--------|------------------------------------|-----|--------------------------------------------------------------------------------------------------------------------------------------------------------------------------------------------------------------------------------------------------|
|        |                                    |     | eligibility for the review                                                                                                                                                                                                                       |
| 14     | Information sources                | 9   | Describe all intended information sources (such as electronic databases, contact with study authors, trial registers or other grey literature sources) with planned dates of coverage                                                            |
| 14, 15 | Search strategy                    | 10  | Present draft of search strategy to be used for at least one electronic database, including planned limits, such that it could be repeated                                                                                                       |
|        | Study records:                     |     |                                                                                                                                                                                                                                                  |
| 15, 16 | Data management                    | 11a | Describe the mechanism(s) that will be used to manage records and data throughout the review                                                                                                                                                     |
| 16, 17 | Selection process                  | 11b | State the process that will be used for selecting studies (such as two independent reviewers) through each phase of the review (that is, screening, eligibility and inclusion in meta-analysis)                                                  |
| 16, 17 | Data collection process            | 11c | Describe planned method of extracting data from reports (such as piloting forms, done independently, in duplicate), any processes for obtaining and confirming data from investigators                                                           |
| 14, 15 | Data items                         | 12  | List and define all variables for which data will be sought (such as PICO items, funding sources), any pre-planned data assumptions and simplifications                                                                                          |
| 18-20  | Outcomes and prioritization        | 13  | List and define all outcomes for which data will be sought, including prioritization of main and additional outcomes, with rationale                                                                                                             |
| 18-20  | Risk of bias in individual studies | 14  | Describe anticipated methods for assessing risk of bias of individual studies, including whether this will be done at the outcome or study level, or both; state how this information will be used in data synthesis                             |
| 17     | Data synthesis                     | 15a | Describe criteria under which study data will be quantitatively synthesised                                                                                                                                                                      |
| 17     |                                    | 15b | If data are appropriate for quantitative synthesis, describe planned summary measures, methods of handling data and methods of combining data from studies, including any planned exploration of consistency (such as $I^2$ , Kendall's $\tau$ ) |
| 17     |                                    | 15c | Describe any proposed additional analyses (such as sensitivity or subgroup analyses, meta-regression)                                                                                                                                            |
| 17     |                                    | 15d | If quantitative synthesis is not appropriate, describe the type of summary planned                                                                                                                                                               |
| -      | Meta-bias(es)                      | 16  | Specify any planned assessment of meta-bias(es) (such as publication bias across studies, selective reporting within studies)                                                                                                                    |
| -      | Confidence in cumulative evidence  | 17  | Describe how the strength of the body of evidence will be assessed (such as GRADE)                                                                                                                                                               |

\* It is strongly recommended that this checklist be read in conjunction with the PRISMA-P Explanation and Elaboration (cite when available) for important clarification on the items. Amendments to a review protocol should be tracked and dated. The copyright for PRISMA-P (including checklist) is held by the PRISMA-P Group and is distributed under a Creative Commons Attribution Licence 4.0.

1  
2  
3  
4  
5 From: Shamseer L, Moher D, Clarke M, Ghersi D, Liberati A, Petticrew M, Shekelle P, Stewart L, PRISMA-P Group. Preferred reporting items for systematic review and  
6 meta-analysis protocols (PRISMA-P) 2015: elaboration and explanation. *BMJ*. 2015 Jan 2;349(jan02 1):g7647.  
7  
8  
9  
10  
11  
12  
13  
14  
15  
16  
17  
18  
19  
20  
21  
22  
23  
24  
25  
26  
27  
28  
29  
30  
31  
32  
33  
34  
35  
36  
37  
38  
39  
40  
41  
42  
43  
44  
45  
46  
47  
48  
49

For peer review only
